RESEARCH ARTICLE

# Suicide prevention curriculum development for health and social care students: A scoping review

Clíodhna O' Brien<sup>1</sup>, Kerrie Gallagher<sup>1</sup>, Michelle O' Driscoll<sup>1,2</sup>, Doireann Ní Dhálaigh<sup>3</sup>, Paul Corcoran<sup>1,3</sup>, Mette Valdersdorf Jensen<sup>4,5</sup>, Eve Griffin<sup>1,3\*</sup>

**1** National Suicide Research Foundation, Cork, Ireland, **2** School of Pharmacy, University College Cork, Cork, Ireland, **3** School of Public Health, University College Cork, Cork, Ireland, **4** Centre for Suicide Research, Odense, Denmark, **5** Department of Regional Health Research, University of Southern Denmark, Odense, Denmark

\* [evegriffin@ucc.ie](mailto:evegriffin@ucc.ie)

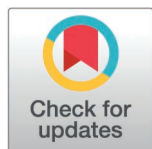

## Abstract

### Background

Suicide is a widely recognised public health concern. International evidence indicates that many individuals who die by suicide have had contact with a healthcare professional in the year preceding their death. Moreover, the evidence regarding the training of healthcare professionals is concerning and points to gaps in the provision of training to adequately prepare health professionals in responding to and assisting individuals in a state of suicidal crisis. There is a recognised opportunity to ensure that all health and social care students, regardless of their discipline, receive formal suicide prevention training. Despite this imperative need, there is a notable absence of literature summarising the current state of such training across healthcare disciplines. This scoping review aimed to identify literature describing the design, development, implementation, and/or evaluation of suicide prevention training for healthcare and/or social care students in higher education settings.

### Methods

Following a predetermined protocol, we conducted a scoping review adhering to PRISMA guidelines for Scoping Reviews (PRISMA-ScR). The author team formulated a search strategy incorporating variations of keywords such as “*student*,” “*suicide prevention*,” and “*education*.” The search spanned six databases—PubMed, ERIC (Education Resources Information Center), CINAHL, Embase, PsycInfo (EBSCO), and Web of Science. Additionally, grey literature sources were explored, alongside forward and backward citation searches of the included articles. Two reviewers independently carried out title and abstract screening, as well as full-text screening. Data extraction from the included studies was also conducted independently by two

## OPEN ACCESS

**Citation:** O' Brien C, Gallagher K, O' Driscoll M, Ní Dhálaigh D, Corcoran P, Jensen MV, et al. (2025) Suicide prevention curriculum development for health and social care students: A scoping review. PLoS One 20(7): e0328776. <https://doi.org/10.1371/journal.pone.0328776>

**Editor:** Naeem Mubarak, Lahore Medical and Dental College, PAKISTAN

**Received:** October 23, 2024

**Accepted:** July 6, 2025

**Published:** July 28, 2025

**Copyright:** © 2025 O' Brien et al. This is an open access article distributed under the terms of the [Creative Commons Attribution License](https://creativecommons.org/licenses/by/4.0/), which permits unrestricted use, distribution, and reproduction in any medium, provided the original author and source are credited.

**Data availability statement:** All relevant data are within the manuscript and its [Supporting information](#) files.

**Funding:** This work was funded by the Health Service Executive, National Office for Suicide Prevention. There is no specific grant number

for this work as the National Suicide Research Foundation receives funding from the National Office for Suicide Prevention as part of a Service Level Agreement. The funders had no role in study design, data collection and analysis, decision to publish, or preparation of the manuscript.

**Competing interests:** The authors have declared that no competing interests exist.

reviewers, with any discrepancies resolved through group consensus. A narrative summary of key findings was developed.

## Results

In total 58 articles were included which detailed several programmes conducted mostly in the United States of America and Australia and were targeted at a variety of healthcare students. When specified, learning outcomes were associated with improving attitudes and developing knowledge. The programmes employed diverse teaching strategies, including lectures, role-playing, and patient simulations. While student evaluations generally showed improvements in knowledge, confidence, and preparedness, the evidence on the effectiveness of different instructional approaches remains inconsistent.

## Conclusion

By integrating comprehensive suicide prevention training into health and social care curricula, there is an opportunity to instil the knowledge, skills, and attitudes necessary to effectively address suicide risk. Further research is warranted to elucidate the most effective delivery methods and teaching modalities for suicide prevention training programmes in health and social care students, with scope for further exploration of interprofessional learning opportunities in this area. The development of internationally recognised core competencies and learning outcomes for health and social care students in this area is also critical to ensure a consistent, effective approach to suicide prevention across healthcare and social care settings.

## Introduction

Suicide is a serious public health concern and is one of the leading causes of preventable deaths globally [1]. Research conducted in the United States indicates that over 90% of individuals who died by suicide had engaged with healthcare services in the year leading up to their death, with an average of 16.7 healthcare visits during that time [2]. In Ireland, a recent psychological autopsy of 307 suicide cases revealed that 80.1% of suicide decedents had recent contact with their general practitioners (GPs), 84.7% were diagnosed with a mental disorder, 60.7% had substance abuse issues, and 30.6% faced physical health problems [3]. This underscores the diverse array of health and social care professionals who may encounter individuals exhibiting suicidal intent, presenting a crucial opportunity for intervention. These professionals may include primary care or hospital-based physicians, surgeons, addiction counsellors, general or mental health nurses, physiotherapists, pharmacists, occupational therapists, social workers, or psychotherapists. Their roles may include conducting initial assessments, offering brief psychosocial support, facilitating referrals to mental health services, contributing to safety planning, and in some cases, providing structured therapies, and ensuring safe medication practices [4]. As gatekeepers

within the healthcare system, health and social care professionals are well-positioned to coordinate timely, multidisciplinary responses. Their capacity to fulfil these responsibilities depends on adequate training, confidence, and access to suicide prevention education. Additionally, contact with primary healthcare is particularly common in the final month before death [4], emphasising the role of medical professionals in recognising those who may be at risk and implementing evidence-based suicide prevention strategies [5].

Nonetheless, research consistently shows that many healthcare professionals lack the knowledge, skills, and confidence to implement such strategies [5–8]. This gap in proficiency highlights the urgent need for comprehensive training and support systems to equip healthcare professionals with the necessary tools and confidence to address suicidal behaviours effectively.

Targeting healthcare students for suicide prevention training offers a promising avenue to ensure a consistent and comprehensive approach within the healthcare system. Furthermore, healthcare professionals' attitudes toward suicide and prevention are shaped during their undergraduate years [9]. In the United States, recommendations from the Office of the Surgeon General advocate for incorporating suicide prevention competencies into undergraduate and graduate programmes for various healthcare professions [10]. This endorsement highlights the importance of integrating suicide prevention training into the educational pathways of future healthcare professionals, ensuring they are well-prepared to address this critical aspect of patient care [10].

Despite the critical need for such training, there is a lack of formal education on suicide prevention for healthcare students [4,11,12]. Factors contributing to this gap include discomfort with the topic, limited time in the curriculum and competing educational priorities [13,14]. Research suggests that trainee healthcare professionals may encounter patients with suicidal ideation but receive insufficient training on how to handle such situations [15]. For example, a survey of pre-doctoral psychology interns indicated that 99% had treated a person with suicidal intent, but only 50% had received formal suicide prevention training [16]. Healthcare students commonly express fear and lack of confidence in treating suicidal patients, with undergraduate medical students rating their interpersonal suicide prevention skills as poor [17]. Training healthcare students could enhance their confidence in responding to patients with suicidal intentions or behaviours in their future professional endeavours [7]. To the authors' knowledge, there has been no prior reporting on the evidence related to a suicide prevention curriculum which incorporates all health and social care students.

The aim of this scoping review was to identify any relevant literature which documented the design, development, implementation, and/or evaluation of a suicide prevention course for undergraduate and postgraduate students of health and social care degree programmes.

## Materials and methods

This scoping review followed the PRISMA-ScR guidelines [18] (see [S1 Table: PRISMA-ScR Checklist](#)). A pre-determined protocol was established for the conduct of this review [19]. We opted for a scoping review approach due to the evolving nature of evidence on suicide prevention curricula, especially concerning health and social care students. The scoping review methodology is fitting for this study, as its primary objective is to identify studies covering various aspects such as the design, development, implementation, and/or evaluation of suicide prevention training specifically tailored for healthcare and/or social care students in higher education settings. This review implemented Arksey and O'Malley's framework [20] for scoping reviews, employing five key stages to guide the study design: (i) formulating the research question; (ii) identifying pertinent studies; (iii) selecting studies; (iv) charting data; and (v) synthesising, summarising, and reporting the findings.

### Formulating the research question

The scoping review aims to address the following question:

“What are the existing practices in the design, development, implementation, and/or evaluation of suicide prevention training tailored for healthcare and/or social care students in higher education settings?”

**Inclusion and exclusion criteria.** Studies eligible for inclusion in this review were those that investigated suicide prevention training provided to undergraduate or postgraduate students pursuing health and/or social care degrees within higher education settings, such as colleges and universities. Quantitative, qualitative, and mixed method studies, as well as any studies that described the development of a suicide prevention module in higher education settings were included. Any relevant grey literature was also included. However, for quality assurance and consistency, only peer-reviewed publications were included in the final review. This criterion was applied to ensure that all included sources had undergone scholarly review and met academic standards of evidence.

Given the exploratory nature of the research, no control group was required, and all studies addressing any aspect of the design, development, implementation, and/or evaluation of suicide prevention training for healthcare and/or social care students in higher education settings were included. There were no geographical limitations, but due to resource constraints, only studies published in English since January 1, 2011, were included. Exclusions were applied to studies reporting on suicide prevention training outside of the higher education curriculum for health and/or social care students (i.e., for professionals in these fields), studies where data specific to health or social care students could not be separated from other student cohorts, studies in languages other than English, and those published before January 1, 2011.

## Identifying relevant studies

**Search strategy and information sources.** The search strategy was collaboratively developed by the author team, who have significant expertise in the area of mental health and suicide prevention research. Additional input was sought from an academic librarian affiliated with the author's institution. The search was implemented across six databases: PubMed, PsycInfo (EBSCO), ERIC, Web of Science Core Collection, CINAHL and Embase. The search was run on the 25<sup>th</sup> of July 2023 and subsequently updated on the 7<sup>th</sup> of July 2024. The strategy was customised for each specific database, incorporating MeSH terms where applicable, and was restricted to titles, abstracts, and keywords in databases that supported it. The search included various iterations of the terms "*students*", "*suicide prevention*", and "*education*". To ensure global coverage, the search terms were deliberately broad and included synonyms and terms relevant to both high and low-middle income settings, no geographical filters were applied. An example of the search strategy used, and the corresponding outcomes are outlined in the [S2 Table](#): Search strategy and results. The indexes and editions available through the author's institutional subscription to Web of Science Core Collection can be viewed in the [S3 File](#): Indexes in Web of Science Core Collection.

In addition to the database searches, the research extended to explore pertinent grey literature sources to capture items not typically accessible through database searching. In addition to the six academic databases searched, we explored grey literature using Google Scholar, the Suicide Prevention Resource Center (SPRC), BASE and ResearchGate. These sources were reviewed to identify potentially relevant materials; however, only four grey literature documents were ultimately cited, as we did not identify other eligible peer-reviewed publications through these platforms that met the inclusion criteria. A manual search of the reference lists of the included studies was carried out to identify any potentially overlooked materials. Additionally, a forward citing search was conducted to identify articles that cited the articles identified through our initial search, further enhancing the scope of the review.

## Study selection

Following the search process, all identified citations were gathered and uploaded to the reference manager software Zotero, Version 6.0.20. Citations were subsequently imported into Rayyan [\[21\]](#), and any duplicates were systematically eliminated. Both title and abstract screening and full text screening were independently undertaken by two reviewers (KG and COB or MOD). Any conflicts arising from this process were discussed, and a third author consulted (EG or PC) where consensus could not be reached.

## Charting the data

Data extraction was independently conducted by three researchers (KG, MVJ, MOD). The data extracted from the relevant studies was entered into an electronic spreadsheet created in Excel ([S4 Table: Data extraction template](#)). The recorded data encompassed information including the authors' names, country of origin, publication year, study setting, study population details, programme specifics, associated learning outcomes, implementation methods of the programme, and the methodologies employed in the respective studies. The data was checked for discrepancies by one reviewer (KG) and any conflicts arising were discussed by the review team until consensus was reached. The data extraction template is available in the [S3 Table: Data extraction template](#).

Consistent with the scoping review research design, the methodological quality of the included articles was not reported or assessed. Scoping reviews typically prioritise breadth and inclusivity over a detailed evaluation of study quality, making this approach in line with the exploratory nature of the research.

## Collating, summarising, and reporting the results

Descriptive statistics were generated to provide a comprehensive summary of the key characteristics of the included studies. In addition, a narrative synthesis was conducted to explore and integrate the findings related to learning outcomes, teaching methodologies, and evaluation outcomes, where applicable. This approach allowed for a cohesive interpretation of the studies by identifying commonalities, and emerging patterns across the various programmes.

## Results

The initial database search was conducted on June 27, 2023, yielding 2,025 results. After adding four records from grey literature sources via Google Scholar [[22–25](#)] and removing duplicates, a total of 945 records remained for the title and abstract screening stage. No additional references that met the inclusion criteria were found via SPRC, BASE or ResearchGate. 91 articles were assessed for eligibility through full-text review, and 46 were included. An additional nine articles were identified and incorporated through forward and backward citation searches, bringing the total to 55 articles.

A subsequent search was re-run across all six databases on July 5, 2024, resulting in the identification of three new articles. Therefore, the final number of articles included in the review was 58. [Fig 1](#) provides a visual overview of the flow of information throughout the distinct phases of this scoping review, detailing the process from initial search to final inclusion.

## Programme details

The included articles outlined several programmes conducted mostly in the United States of America (USA) ( $n=32$ , 55%) and Australia ( $n=7$ , 12%). The remaining programmes were delivered to student populations in Canada, the United Kingdom, India, Singapore, Taiwan, Belgium, France, Spain, the Netherlands, Japan, and China. Programmes were targeted at a variety of healthcare students including Social Work, Pharmacy, Medicine, Nursing, Psychology and Youth Work, with some programmes aimed at interdisciplinary teaching ( $n=10$ , 17%). Most programmes were delivered to undergraduate students ( $n=40$ , 69%), with the remainder delivered to postgraduates ( $n=13$ , 22%) or both undergraduate and postgraduate students ( $n=5$ , 9%). There was a broad mix of when the suicide prevention training was implemented ranging from first to final year students and the number of students in courses ranged from 5 to 1345 in total. Session lengths spanned from fifteen minutes to seven and a half hours. Number of sessions also varied from one session to semester long undergraduate courses containing 16 sessions [[26](#)]. [Table 1](#) outlines the breakdown of programme details.

Across the 58 included studies, there was limited reporting on whether suicide prevention education was delivered as a core (compulsory) or elective (optional) component of academic programmes. Only 13 studies (22%) explicitly indicated that the training was embedded as a required or core part of the curriculum [[14,17,22,27–36](#)]. In contrast, a small number

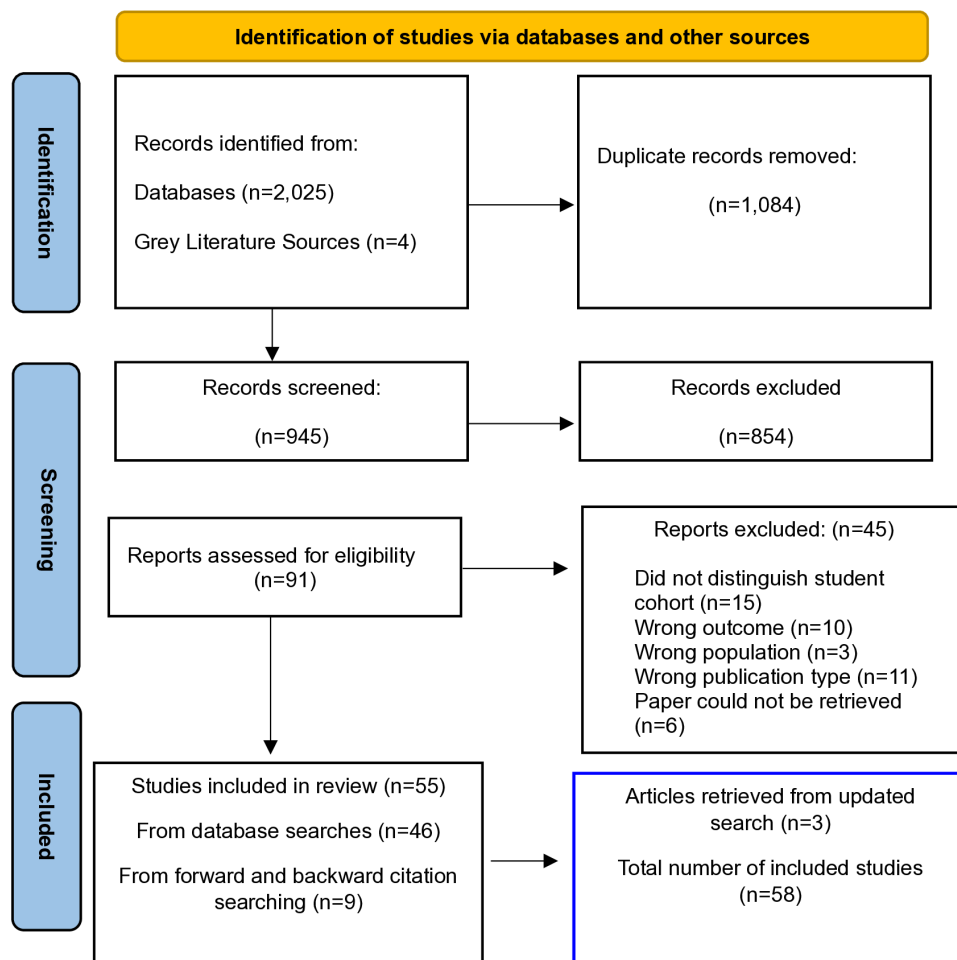

Fig 1. PRISMA flow diagram.

<https://doi.org/10.1371/journal.pone.0328776.g001>

of studies ( $n=3$ ) described the training as elective or optional, typically delivered through workshops, pilot modules, or extracurricular formats [9,37,38]. The majority of studies ( $n=42$ , 73%) did not specify the course type. In several of these, training was delivered as a stand-alone intervention, a pilot programme, or through online modules, making it difficult to determine whether participation was voluntary or integrated into formal coursework.

Most articles did not specify the percentage of the module dedicated to suicide prevention, however, in some cases ( $n=12$ , 20%), the full programme was dedicated to suicide prevention training [9,14,25–27,31,32,39–43]. Similarly, most papers did not mention a regulatory/accreditation body for the programme. Those that were mentioned included the Association of Directors of Medical Student Education in Psychiatry [44], the Quality Care Pharmacy Programme [28] and the American Psychiatric Association [9]. One of the programmes is listed in the National Registry of Evidence Based Programs and Practices [45]. Almost one quarter of articles ( $n=13$ , 22%) outlined that the suicide prevention training programme was deemed essential and required training for their healthcare students [14,22,30,33–36,46–51] and the remainder either did not deem the coursework as essential or failed to specify. Eight articles (14%) described programmes that mandated attendance at the training [22,33–36,48–50] and the remainder either did not specify or did not require mandatory attendance.



**Table 1. Programme details.**

| Authors                               | Country   | Setting                         | Degree course(s)                    | Stage of the degree                                   | Student population             | Students (n)                                            | Sessions (n)         | Session length (hr:mins) | Core or elective course |
|---------------------------------------|-----------|---------------------------------|-------------------------------------|-------------------------------------------------------|--------------------------------|---------------------------------------------------------|----------------------|--------------------------|-------------------------|
| Almeida <i>et al.</i> , 2017 [14]     | USA       | Graduate school                 | Social Work                         | Mixed                                                 | Postgraduate                   | 22                                                      | 14                   | 02:50                    | Core                    |
| Afsharnejad <i>et al.</i> , 2022 [61] | Australia | University                      | Interdisciplinary                   | Mixed                                                 | Undergraduate and Postgraduate | 129                                                     | 6                    | Unknown                  | Unknown                 |
| Bornheimer <i>et al.</i> , 2024 [39]  | USA       | University                      | Social Work                         | Unknown                                               | Postgraduate                   | 22                                                      | 2                    | 05:00                    | Elective                |
| Boukouvalas <i>et al.</i> , 2018 [62] | Australia | University                      | Pharmacy                            | Mixed                                                 | Undergraduate and Postgraduate | 252                                                     | 15                   | Unknown                  | Unknown                 |
| Carpenter <i>et al.</i> , 2023 [37]   | USA       | University                      | Pharmacy                            | Mixed                                                 | Postgraduate                   | 180                                                     | 1                    | 1:15                     | Elective                |
| Cates and Woolley, 2017 [5]           | USA       | University – clinical placement | Pharmacy                            | 4 <sup>th</sup> year                                  | Undergraduate                  | 41                                                      | Unknown              | Unknown:                 | Unknown                 |
| Chuop <i>et al.</i> , 2021 [44]       | USA       | University                      | Medicine                            | 2 <sup>nd</sup> year                                  | Undergraduate                  | 154                                                     | 2                    | 00:50                    | Unknown                 |
| Cramer <i>et al.</i> , 2019 [40]      | USA       | University                      | Interdisciplinary                   | Mixed – introduced at various stages of degree course | Undergraduate and Postgraduate | 32                                                      | 15                   | Unknown                  | Unknown                 |
| Cramer & Long, 2018 [27]              | USA       | University                      | Interdisciplinary                   | Mixed – introduced at various stages of degree course | Undergraduate                  | 20                                                      | 6                    | Unknown                  | Core                    |
| Cramer <i>et al.</i> , 2016 [52]      | USA       | University                      | Psychology                          | Mixed – introduced at various stages of degree course | Postgraduate                   | 5                                                       | Semester long course | Unknown                  | Unknown                 |
| De Silva <i>et al.</i> , 2015 [17]    | Australia | University                      | Medicine, Paramedicine and Pharmacy | 1 <sup>st</sup> year                                  | Undergraduate                  | 542                                                     | 1                    | 05:00                    | Core                    |
| Desai <i>et al.</i> , 2018 [53]       | India     | University – clinical placement | Medicine                            | Unknown                                               | Undergraduate                  | 32                                                      | 4                    | 03:00                    | Unknown                 |
| El-Den <i>et al.</i> , 2018 [28]      | Australia | University                      | Pharmacy                            | 4 <sup>th</sup> year                                  | Undergraduate                  | 163                                                     | Unknown              | Unknown                  | Core                    |
| Goh <i>et al.</i> , 2016 [29]         | Singapore | University                      | Nursing                             | 2 <sup>nd</sup> year                                  | Undergraduate                  | 95                                                      | 2                    | Unknown                  | Core                    |
| Harshe <i>et al.</i> , 2022 [30]      | India     | University                      | Medicine                            | Unknown                                               | Undergraduate                  | 57                                                      | 1                    | 01:20                    | Core                    |
| Heyman <i>et al.</i> , 2015 [31]      | Scotland  | University                      | Mental Health Nursing               | 2 <sup>nd</sup> year                                  | Undergraduate                  | 27                                                      | 2                    | Unknown                  | Core                    |
| Hjelvik <i>et al.</i> , 2022 [25]     | USA       | University                      | Medicine                            | Mixed                                                 | Undergraduate                  | 273                                                     | 1                    | 1:45                     | Unknown                 |
| Hill <i>et al.</i> , 2024 [63]        | USA       | University                      | Psychology                          | Unknown                                               | Undergraduate                  | Intervention group (n = 179)<br>Control group (n = 195) | 1                    | 01:00                    | Unknown                 |
| Hutson and Zeno, 2021 [54]            | USA       | University                      | Nursing                             | Unknown                                               | Undergraduate                  | Unknown                                                 | Unknown              | 00:20                    | Unknown                 |

(Continued)

**Table 1.** (Continued)

| Authors                                 | Country        | Setting    | Degree course(s)           | Stage of the degree                                   | Student population | Students (n)                                               | Sessions (n) | Session length (hr:mins) | Core or elective course |
|-----------------------------------------|----------------|------------|----------------------------|-------------------------------------------------------|--------------------|------------------------------------------------------------|--------------|--------------------------|-------------------------|
| Jacobson <i>et al.</i> , 2012 [41]      | USA            | University | Social Work                | 2 <sup>nd</sup> year                                  | Postgraduate       | 72                                                         | 1            | 01:30                    | Unknown                 |
| LeCloux, 2021 [22]                      | USA            | University | Social Work                | Unknown                                               | Postgraduate       | 53                                                         | Unknown      | Unknown                  | Core                    |
| Kerr <i>et al.</i> , 2018 [32]          | United Kingdom | University | Mental Health Nursing      | 1st year                                              | Undergraduate      | 128                                                        | 1            | 03:30                    | Core                    |
| Kourgiantakis <i>et al.</i> , 2021 [24] | Canada         | University | Social Work                | Mixed                                                 | Postgraduate       | 15                                                         | 1            | Unknown                  | Unknown                 |
| Kratz <i>et al.</i> , 2020 [23]         | USA            | University | Social Work                | 1st year                                              | Postgraduate       | 58                                                         | 4            | Unknown                  | Unknown                 |
| Kullberg <i>et al.</i> , 2020 [64]      | Netherlands    | University | Psychology                 | Mixed                                                 | Undergraduate      | Intervention group (n = 141)<br>Control group (n = 113)    | 1            | 01:00                    | Unknown                 |
| Lerchenfeldt <i>et al.</i> , 2020 [46]  | USA            | University | Nursing                    | 2 <sup>nd</sup> year                                  | Undergraduate      | 342                                                        | Unknown      | Unknown                  | Unknown                 |
| Lu <i>et al.</i> , 2016 [65]            | Taiwan         | University | Nursing                    | Unknown                                               | Undergraduate      | Unknown                                                    | Unknown      | Unknown                  | Unknown                 |
| Luebbert and Popkess, 2015 [47]         | USA            | University | Nursing                    | Mixed                                                 | Undergraduate      | 34 (simulation, n = 18)<br>control group (lecture, n = 16) | 1            | 01:40                    | Unknown                 |
| Magerman <i>et al.</i> , 2022 [66]      | Belgium        | University | Interdisciplinary          | 4 <sup>th</sup> year                                  | Undergraduate      | 14                                                         | 3            | 01:00–01:40              | Unknown                 |
| McKeirnan <i>et al.</i> , 2023 [67]     | USA            | University | Pharmacy                   | Mixed                                                 | Postgraduate       | 235                                                        | 1            | 07:30                    | Unknown                 |
| Mospan <i>et al.</i> , 2017 [33]        | USA            | University | Interdisciplinary          | 1 <sup>st</sup> year                                  | Undergraduate      | 356                                                        | 15           | 03:00                    | Core                    |
| Muehlenkamp and Quinn-Lee, 2023 [42]    | USA            | University | Interdisciplinary          | Mixed                                                 | Undergraduate      | 1345                                                       | 1            | 00:40–00:50              | Unknown                 |
| Muehlenkamp and Thoen, 2019 [26]        | USA            | University | Psychology and Social Work | Mixed – introduced at various stages of degree course | Undergraduate      | 68 (intervention group n = 38) (control group n = 30)      | 16           | Unknown                  | Unknown                 |
| Nebhinani <i>et al.</i> , 2020 [56]     | India          | University | Medicine                   | Mixed – introduced at various stages of degree course | Undergraduate      | 243                                                        | 1            | 03:00                    | Unknown                 |
| Ng <i>et al.</i> , 2022 [34]            | New Zealand    | University | Medicine                   | Mixed – introduced at various stages of degree course | Undergraduate      | 9                                                          | 1            | Unknown                  | Core                    |
| O'Reilly <i>et al.</i> , 2019 [48]      | Australia      | University | Pharmacy                   | 3 <sup>rd</sup> year                                  | Undergraduate      | 22                                                         | 1            | Unknown                  | Unknown                 |
| Osteen <i>et al.</i> , 2014 [68]        | USA            | University | Social Work                | 2 <sup>nd</sup> year                                  | Undergraduate      | 73                                                         | 1            | 01:30                    | Unknown                 |
| Osteen, 2018 [45]                       | USA            | University | Social Work                | Unknown                                               | Postgraduate       | 38                                                         | 1            | 01:30                    | Unknown                 |
| Patel <i>et al.</i> , 2018 [57]         | India          | University | Medicine                   | Unknown                                               | Undergraduate      | 20                                                         | 1            | 03:00                    | Unknown                 |

(Continued)



**Table 1.** (Continued)

| Authors                                    | Country        | Setting                         | Degree course(s)     | Stage of the degree                                   | Student population             | Students (n)                              | Sessions (n)     | Session length (hr:mins) | Core or elective course |
|--------------------------------------------|----------------|---------------------------------|----------------------|-------------------------------------------------------|--------------------------------|-------------------------------------------|------------------|--------------------------|-------------------------|
| Perez <i>et al.</i> , 2022 [51]            | USA            | University                      | Nursing              | Unknown                                               | Postgraduate                   | 105                                       | 1                | 00:15                    | Unknown                 |
| Phillips <i>et al.</i> , 2019 [11]         | United Kingdom | University – clinical placement | Medical Students     | Mixed – introduced at various stages of degree course | Undergraduate                  | 35                                        | 6                | Unknown                  | Unknown                 |
| Pothireddy <i>et al.</i> , 2022 [49]       | USA            | University                      | Pharmacy             | Mixed – introduced at various stages of degree course | Undergraduate                  | 139                                       | 1-3 <sup>i</sup> | 00:45                    | Unknown                 |
| Price <i>et al.</i> , 2022 [35]            | USA            | University – clinical placement | Medicine             | 3 <sup>rd</sup> year                                  | Undergraduate                  | 75                                        | 1                | Unknown                  | Core                    |
| Pullen <i>et al.</i> , 2016 [36]           | USA            | University                      | Nursing              | 2 <sup>nd</sup> year                                  | Undergraduate                  | 150                                       | 1                | 01:30                    | Core                    |
| Quemada-González <i>et al.</i> , 2024 [69] | Spain          | University                      | Nursing              | 3 <sup>rd</sup> year                                  | Undergraduate                  | 72                                        | 1                | Unknown                  | Unknown                 |
| Ranahan, 2020 [58]                         | Canada         | University                      | Youth Work           | Unknown                                               | Undergraduate and Postgraduate | 13                                        | 3                | 03:00                    | Unknown                 |
| Retamero <i>et al.</i> , 2014 [50]         | USA            | University                      | Medicine             | 2 <sup>nd</sup> year                                  | Undergraduate                  | 180                                       | 1                | 01:36                    | Unknown                 |
| Scott, 2015 [70]                           | USA            | University                      | Social Work          | 2 <sup>nd</sup> year                                  | Postgraduate                   | 20                                        | 15               | 01:30                    | Unknown                 |
| Sharpe <i>et al.</i> , 2014 [43]           | USA            | University                      | Social work          | 2 <sup>nd</sup> year                                  | Postgraduate                   | 73 (intervention = 35) control (n = 33)   | 1                | 01:30                    | Unknown                 |
| Stallman, 2020 [59]                        | Australia      | University                      | Interdisciplinary    | Mixed                                                 | Undergraduate and Postgraduate | Unknown                                   | 8                | Unknown                  | Unknown                 |
| Takahashi <i>et al.</i> , 2022 [60]        | Japan          | University                      | Medicine             | 2 <sup>nd</sup> year                                  | Undergraduate                  | 136                                       | 3                | 01:15                    | Unknown                 |
| Vincent and Davis, 2016 [55]               | Canada         | University                      | Pharmacy             | 3 <sup>rd</sup> year                                  | Undergraduate                  | 1150                                      | 1                | 01:30                    | Unknown                 |
| Ward, 2011 [71]                            | Australia      | University                      | Clinical Nursing     | 3 <sup>rd</sup> year                                  | Undergraduate                  | 20                                        | 3                | 01:00                    | Unknown                 |
| Wathelet <i>et al.</i> , 2023 [38]         | France         | University                      | Interdisciplinary    | Mixed                                                 | Undergraduate                  | 144 (intervention n = 48, control n = 96) | 20               | Mixed                    | Elective                |
| Willson <i>et al.</i> , 2020 [72]          | USA            | University                      | Pharmacy             | 1 <sup>st</sup> year                                  | Undergraduate                  | 136                                       | Unknown          | 03:30                    | Unknown                 |
| Witry <i>et al.</i> , 2020 [73]            | USA            | University                      | Pharmacy             | Mixed – introduced at various stages of degree course | Undergraduate                  | 111                                       | 2                | 02:30                    | Unknown                 |
| Witry <i>et al.</i> , 2019 [74]            | USA            | University                      | Pharmacy             | 1 <sup>st</sup> year                                  | Undergraduate                  | 108                                       | 1                | 00:50                    | Unknown                 |
| Yousuf <i>et al.</i> , 2013 [9]            | China          | University                      | Medicine and Surgery | Mixed – Elective                                      | Undergraduate                  | 22                                        | 10               | 05:30                    | Elective                |

<sup>i</sup>Taught in one session at one participating university and taught in three sessions at the second participating university.

<https://doi.org/10.1371/journal.pone.0328776.t001>

## Learning outcomes

Typically, learning outcomes were linked to improving attitudes and fostering the acquisition of knowledge and skills, collectively referred to as core competencies. Overall, learning outcomes incorporated the acquisition of a range of abilities necessary for effectively identifying, assessing, and intervening in situations involving suicide risk. Learning outcomes for students typically involved learning about suicide statistics, risk factors, protective factors and warning signs and developing skills in risk screening and assessment and the implementation of an intervention for individuals with suicidal thoughts and behaviours. In one study, academic writing skills were included as learning outcomes for healthcare students in their suicide prevention training course [40]. In addition, two programmes included self-care elements as learning outcomes [40,52]. An overview of the aims of each of the programmes with the associated learning outcomes, where they were specified is provided in the supplementary information (S5 Table: Learning outcomes of suicide prevention training for health and social care students).

## Teaching methodologies

A wide range of methodologies were employed in the suicide prevention training programmes, as summarised in Table 2. Many studies reported varying methods of delivery and student preferences in relation to methodology, however, there is an apparent lack of evidence as to which are most effective in delivering suicide prevention content [44]. More than half of the programmes ( $n=32$ , 55%) adopted a lecture-based format [11,14,17,23,25–27,29–31,33–35,38,41,44–47,49,52–60]. Role-playing exercises ( $n=17$ , 29%) and patient simulations ( $n=15$ , 25%) were also frequently incorporated into both delivery and assessment, while case studies ( $n=6$ , 10%) were less commonly used. Discussion was a prominent method, with large group discussions featured in twelve programmes (20%) and small group discussions in ten programmes (17%). In one programme, medical students found skills training, including risk assessment and crisis intervention, and group discussions to be more beneficial over theory-based content [9]. Online learning was reported in nine studies (15%), and videos were frequently employed as a teaching tool ( $n=17$ , 29%). Other methodologies included active learning ( $n=4$ , 7%), interactive learning ( $n=10$ , 17%) problem-based learning ( $n=2$ , 3%), debate ( $n=4$ , 7%), development of a research proposal ( $n=2$ , 3%), readings, ( $n=9$ , 15%), self-reflection ( $n=9$ , 15%) and think-pair-share ( $n=1$ , 1.7%).

## Evaluations of suicide prevention training programmes

All studies in this review that included student evaluations ( $n=32$ , 55%) reported that most health and social care students found suicide prevention content to be positive, valuable, and beneficial. Table 3 outlines the findings from studies that included an evaluation of an implemented programme. Negative outcomes for students were not specifically reported considering the training, although the content was considered emotionally difficult by some participants [73].

Of these studies, the most commonly assessed outcomes were levels of knowledge ( $n=22/32$ , 69%) [14,17,22,23,25–27,36,37,40–42,45,49,52,53,57,59,61,63,64,72], confidence ( $n=11/32$ , 34%) [14,22,25,29,38,44,49,59,64,72,73], self-perceived self-efficacy or competency ( $n=9/32$ , 28%) [23,26,27,37,41,45,61,63] and attitudes towards suicide/suicide prevention ( $n=8/32$ , 25%) [5,9,17,26,44,45,57,59]. Many programmes demonstrated significant improvements in students' knowledge and confidence regarding suicide prevention. For instance, Almeida et al. (2017) reported statistically significant increases in knowledge, confidence, and preparedness following their module [14]. Similarly, Carpenter et al. (2023) and Witry et al. (2020) found substantial gains in both knowledge and self-efficacy post-training [37,73], with a notable number of students feeling more prepared to intervene when recognising warning signs.

Several evaluations emphasised the importance of practical training methods, such as simulations and role-playing. Bornheimer et al. (2024) and Cramer et al. (2019) found that simulation-based training significantly improved clinical skills and preparedness [39,40]. Students consistently expressed a desire for more hands-on training, and programs utilising standardised patients and case-based scenarios often reported higher satisfaction rates [29]. Many students indicated a

preference for interactive and practical learning methods over theoretical instruction. LeCloux (2021) found that most students preferred face-to-face or hybrid delivery models [22], and several studies highlighted improvements in competency through active participation in suicide prevention strategies [22,29,39,40,44,73].

### Challenges associated with suicide prevention training programmes

Stigma and the difficulty discussing the topic of suicide was reported as a challenge for students and faculty in one study [72]. This was also evidenced in skills demonstration as many students did not directly ask about suicide during role play activities despite the training provided. One study of a suicide prevention training programme with pharmacy students noted that it was challenging to encourage students to apply their suicide prevention training skills following a training session [73]. However, the authors presented the idea of employing the use of patient simulations as a possibility for providing students with the opportunity to practise applying the skills. The need for students to apply their knowledge and skills was also highlighted by Scott et al. (2015) who reported that students are eager to engage in deeper learning and to learn 'what to say when...' as well as the general risk and protective factors associated with suicide prevention [70]. Additionally, Cramer and Long (2018) reported that the inclusion of people with lived experience for patient simulation provides an avenue for further interaction for students to apply their skills in a meaningful way [27]. However, further research on this is warranted [23].

A recurring challenge identified was the limited time available to cover all necessary content [11,17,36,52], in particular, the importance of allowing sufficient time for students to practise applying their new skills in suicide prevention [44]. Another significant barrier cited was the lack of space within the existing curriculum, which often relegates suicide prevention training to elective courses rather than required coursework. To address this, Cramer and colleagues (2016) suggested integrating suicide prevention content into existing modules, such as psychological assessment, abnormal psychology, or counselling theories, ensuring that it becomes a core component of healthcare education [52].

### Discussion

This scoping review identified 58 articles describing the design, development, implementation, and/or quantitative evaluation of suicide prevention training for health and social care students, presenting findings from across thirteen countries. In summary, suicide prevention training was associated with increasing students' knowledge, confidence, and favourable attitudes towards suicide prevention; however, the content of the programmes, as well as the development and modality of the training, varied significantly. In stating this, it is important to acknowledge the need for flexibility in suicide prevention training. This adaptability is a key consideration, as it demonstrates that institutions can tailor suicide prevention training to fit their specific needs and constraints. This aligns with broader literature on curricular innovation, which emphasises the importance of agile, flexible, context-sensitive approaches in healthcare education [75,76]. Whether offering a single session or a semester-long course, institutions can design programmes that fit within their curricular framework, ensuring that suicide prevention content can be delivered, even in resource-limited environments.

In articles that had specified learning outcomes, the focus was centred on developing core competencies related to suicide prevention – recognising risk and protective factors, communication, and intervention skills. These outcomes were consistent across healthcare disciplines, highlighting the essential skills required to identify, assess, and intervene with individuals at risk regardless of profession. These competencies align with frameworks such as the UK's National Collaborating Centre for Mental Health suicide prevention competency framework, which aim to support professionals without formal mental health training [77]. It seeks to bridge gaps in knowledge and provide practical information, enabling healthcare professionals to contribute effectively to suicide prevention efforts. Comparable frameworks have been recommended in international guidance, including WHO (2014), suggesting that suicide prevention training should be embedded as a universal competence for all frontline professionals [78]. Indeed, these core competencies are not unique to suicide prevention. Similar skills are required in other priority areas of healthcare education, including domestic violence

**Table 2. Teaching methodologies.**

| Authors                              | Active Learning | Interactive Learning | Problem-based Learning | Case Studies | Debate | Development of a Research Proposal | Large Group | Small Group | Think-Pair-Share |
|--------------------------------------|-----------------|----------------------|------------------------|--------------|--------|------------------------------------|-------------|-------------|------------------|
| Almeida et al., 2017 [14]            |                 |                      |                        | ✓            | ✓      |                                    | ✓           | ✓           |                  |
| Afsharnejad et al., 2022 [61]        |                 | ✓                    |                        | ✓            |        |                                    |             |             |                  |
| Bornheimer et al., 2024 [39]         |                 |                      |                        |              |        |                                    |             |             |                  |
| Boukouvalas et al., 2018 [62]        |                 |                      |                        |              |        |                                    |             |             |                  |
| Carpenter et al., 2023 [37]          |                 |                      |                        |              |        |                                    | ✓           |             |                  |
| Cates and Woolley, 2017 [5]          |                 |                      |                        |              |        |                                    |             |             |                  |
| Chuop et al., 2020 [44]              |                 |                      |                        |              |        |                                    | ✓           |             |                  |
| Cramer et al., 2019 [40]             |                 | ✓                    |                        |              |        |                                    |             | ✓           |                  |
| Cramer & Long 2018 [27]              |                 | ✓                    |                        |              | ✓      |                                    |             |             |                  |
| Cramer et al., 2016 [52]             |                 |                      |                        |              | ✓      | ✓                                  |             |             |                  |
| Desai et al., 2018 [53]              |                 |                      |                        |              |        |                                    |             |             |                  |
| De Silva et al., 2015 [17]           |                 |                      |                        | ✓            |        |                                    | ✓           |             |                  |
| El-Den et al., 2018 [28]             |                 |                      |                        |              |        |                                    |             |             |                  |
| Goh et al., 2016 [29]                |                 |                      |                        |              |        |                                    |             |             |                  |
| Harshe et al., 2022 [30]             |                 |                      |                        |              |        |                                    |             |             |                  |
| Heyman et al., 2015 [31]             |                 |                      |                        |              |        |                                    | ✓           |             |                  |
| Hjelvik et al., 2022 [25]            |                 |                      |                        |              |        |                                    | ✓           |             |                  |
| Hill et al., 2024 [63]               |                 |                      |                        |              |        |                                    |             |             |                  |
| Hutson and Zeno, 2021 [54]           | ✓               |                      |                        | ✓            |        |                                    |             |             |                  |
| Jacobson et al., 2012 [41]           |                 |                      |                        |              |        |                                    |             |             |                  |
| Kerr et al., 2018 [32]               |                 |                      |                        |              |        |                                    | ✓           |             |                  |
| Kourgiantakis et al., 2021 [24]      | ✓               | ✓                    |                        |              |        |                                    |             |             |                  |
| Kullberg et al., 2020 [64]           |                 |                      |                        | ✓            |        |                                    |             |             |                  |
| Kratz et al., 2020 [23]              |                 |                      |                        |              |        |                                    |             |             |                  |
| LeCloux, 2021 [22]                   |                 |                      |                        |              |        |                                    |             |             |                  |
| Lerchenfeldt et al., 2020 [46]       |                 |                      |                        | ✓            |        |                                    | ✓           |             |                  |
| Lu et al., 2016 [65]                 |                 |                      |                        |              |        |                                    |             |             |                  |
| Luebbert and Popkess, 2015 [47]      |                 |                      |                        |              |        |                                    |             |             |                  |
| Magerman et al., 2022 [66]           |                 |                      |                        |              |        |                                    |             | ✓           |                  |
| McKeirnan et al., 2023 [67]          |                 |                      |                        |              |        |                                    |             | ✓           |                  |
| Muehlenkamp and Quinn-Lee, 2023 [42] |                 |                      |                        |              |        |                                    |             |             |                  |
| Mospan et al., 2017 [33]             |                 | ✓                    |                        |              |        |                                    |             | ✓           |                  |
| Muehlenkanp and Thoen, 2019 [26]     | ✓               | ✓                    |                        |              |        |                                    | ✓           |             |                  |
| Nebhinani et al., 2020 [56]          |                 |                      |                        |              |        |                                    |             |             |                  |
| Ng et al., 2022 [34]                 |                 |                      |                        |              |        |                                    |             | ✓           |                  |
| O'Reilly et al., 2019 [48]           |                 |                      |                        |              |        |                                    |             |             |                  |
| Osteen, 2018 [45]                    |                 |                      |                        |              |        |                                    |             |             |                  |
| Osteen et al., 2014 [68]             |                 |                      |                        |              |        |                                    |             |             |                  |
| Patel et al., 2018 [57]              |                 | ✓                    |                        |              |        |                                    |             |             |                  |
| Perez et al., 2022 [51]              |                 |                      |                        |              |        |                                    |             |             |                  |
| Phillips et al., 2019 [11]           |                 |                      |                        |              |        |                                    | ✓           |             |                  |

| Lecture | Online Learning | Patient Simulation | Pre-classroom Learning | Readings | Role Play | Self-Reflection | General Written Assignment | Video Clips | None Described |
|---------|-----------------|--------------------|------------------------|----------|-----------|-----------------|----------------------------|-------------|----------------|
| ✓       | ✓               |                    |                        |          | ✓         |                 |                            |             |                |
|         | ✓               |                    |                        |          |           |                 |                            | ✓           |                |
| ✓       |                 | ✓                  |                        |          |           |                 |                            | ✓           |                |
| ✓       |                 | ✓                  |                        |          |           |                 |                            |             |                |
|         |                 |                    |                        |          |           |                 |                            | ✓           |                |
|         |                 |                    |                        |          |           |                 |                            |             | ✓              |
| ✓       |                 |                    | ✓                      |          |           |                 |                            |             |                |
|         |                 |                    |                        | ✓        |           | ✓               |                            |             |                |
| ✓       | ✓               |                    |                        | ✓        |           | ✓               |                            |             |                |
| ✓       |                 |                    |                        |          | ✓         |                 |                            |             |                |
| ✓       |                 |                    |                        |          | ✓         |                 |                            |             |                |
| ✓       |                 |                    |                        |          | ✓         |                 |                            | ✓           |                |
|         |                 | ✓                  |                        |          | ✓         |                 |                            |             |                |
| ✓       |                 | ✓                  |                        |          |           |                 |                            |             |                |
| ✓       |                 |                    |                        |          | ✓         |                 |                            |             |                |
| ✓       |                 |                    |                        |          | ✓         |                 |                            |             |                |
| ✓       |                 |                    |                        |          | ✓         |                 |                            |             |                |
|         | ✓               |                    |                        |          |           |                 |                            |             |                |
| ✓       |                 | ✓                  |                        |          |           | ✓               |                            |             |                |
| ✓       |                 |                    | ✓                      |          |           |                 |                            |             |                |
|         |                 | ✓                  |                        |          |           |                 | ✓                          | ✓           |                |
|         | ✓               |                    |                        |          |           |                 |                            | ✓           |                |
| ✓       |                 | ✓                  |                        | ✓        | ✓         |                 |                            |             |                |
|         |                 |                    |                        |          |           |                 |                            |             | ✓              |
| ✓       |                 |                    | ✓                      | ✓        | ✓         | ✓               |                            |             |                |
|         |                 | ✓                  |                        |          |           | ✓               |                            | ✓           |                |
| ✓       |                 | ✓                  |                        |          |           |                 |                            |             |                |
|         | ✓               |                    |                        |          | ✓         | ✓               |                            | ✓           |                |
|         | ✓               |                    | ✓                      |          |           |                 |                            |             |                |
|         |                 |                    |                        |          |           |                 |                            |             | ✓              |
| ✓       |                 | ✓                  |                        |          |           |                 |                            |             |                |
| ✓       |                 |                    |                        |          |           |                 |                            |             |                |
| ✓       |                 |                    |                        |          |           |                 |                            |             |                |
| ✓       | ✓               |                    |                        |          |           |                 |                            | ✓           |                |
|         |                 | ✓                  |                        |          |           |                 |                            |             |                |
| ✓       |                 |                    |                        |          |           |                 |                            |             | ✓              |
| ✓       |                 | ✓                  |                        |          |           |                 |                            |             |                |
| ✓       |                 | ✓                  |                        |          |           | ✓               |                            |             |                |

(Continued)

**Table 2.** (Continued)

| Authors                            | Active Learning | Interactive Learning | Problem-based Learning | Case Studies | Debate | Development of a Research Proposal | Large Group | Small Group | Think-Pair-Share |
|------------------------------------|-----------------|----------------------|------------------------|--------------|--------|------------------------------------|-------------|-------------|------------------|
| Pothireddy et al., 2022 [49]       |                 |                      |                        |              |        |                                    |             |             |                  |
| Price et al., 2022 [35]            |                 |                      |                        |              |        |                                    |             |             |                  |
| Pullen et al., 2016 [36]           |                 |                      |                        |              |        |                                    |             |             |                  |
| Quemada-González et al., 2024 [69] |                 |                      | ✓                      |              |        |                                    |             |             |                  |
| Ranahan, 2020 [58]                 |                 |                      |                        |              |        |                                    |             |             |                  |
| Retamero et al., 2014 [50]         |                 |                      |                        |              |        |                                    |             |             |                  |
| Scott, 2015 [70]                   |                 |                      |                        |              |        | ✓                                  |             | ✓           |                  |
| Sharpe et al., 2014 [43]           |                 |                      |                        |              |        |                                    |             |             |                  |
| Stallman, 2020 [59]                |                 | ✓                    |                        |              |        |                                    |             |             |                  |
| Takahashi et al., 2022 [60]        |                 |                      |                        |              |        |                                    |             |             |                  |
| Vincent and Davis, 2016 [55]       |                 |                      |                        | ✓            | ✓      |                                    |             |             |                  |
| Ward, 2011 [71]                    |                 |                      | ✓                      | ✓            |        |                                    |             | ✓           |                  |
| Wathelet et al., 2023 [38]         |                 |                      |                        |              |        |                                    |             |             |                  |
| Willson et al., 2020 [72]          | ✓               |                      |                        | ✓            |        |                                    | ✓           |             |                  |
| Witry et al., 2020 [73]            |                 |                      |                        | ✓            |        |                                    | ✓           |             |                  |
| Witry et al., 2019 [74]            |                 | ✓                    |                        | ✓            |        |                                    |             | ✓           | ✓                |
| Yousuf et al., 2013 [9]            |                 | ✓                    |                        | ✓            |        |                                    |             | ✓           |                  |

<https://doi.org/10.1371/journal.pone.0328776.t002>

response, substance use intervention, and trauma-informed care [79–81]. All of these domains require professionals to recognise complex risk factors, communicate compassionately in high-stakes situations, and take appropriate action – often without the benefit of specialist training. Embedding these transferable skills across curricula ensures that future practitioners are well-equipped to respond confidently and ethically to a range of psychosocial challenges encountered in clinical practice.

The use of diverse teaching methodologies, such as case studies, group discussions, and role-play, reflects efforts to make suicide prevention training more engaging and practical, highlighting issues such as health inequalities and cultural sensitivities. There is, however, no consensus on the most effective delivery methods to use [44]. While lectures are a common component, which are important in imparting foundational knowledge, they appear to be less effective compared to interactive strategies such as role-playing and patient simulations, which provide students with hands-on experience in crisis intervention [82]. A study reflecting on five years of suicide prevention training for pharmacy students found that the most effective methods to train students in crisis intervention involved both inspiring them and equipping them with practical interview techniques to confidently ask about suicide [53]. This aligns with educational research in other areas of health and social care, where several studies have found that active learning methods, including patient simulations, are regarded as valuable learning tools that students can effectively apply in clinical practice [83–91]. The inclusion of teaching methodologies that facilitate experiential learning are supported by Kolb’s Experiential Learning Theory, which emphasises that learning through transformation of experience consolidates active learning and reflection [92]. These approaches facilitate deeper engagement and long-term knowledge retention, especially when addressing sensitive topics such as suicide [93,94].

The inclusion of people with lived experience in patient simulations was also noted in the literature for its positive impact on students’ confidence and communication skills. For example, one study reporting that involving people with



| Lecture | Online Learning | Patient Simulation | Pre-classroom Learning | Readings | Role Play | Self-Reflection | General Written Assignment | Video Clips | None Described |
|---------|-----------------|--------------------|------------------------|----------|-----------|-----------------|----------------------------|-------------|----------------|
| ✓       |                 |                    |                        | ✓        |           | ✓               |                            | ✓           |                |
| ✓       |                 | ✓                  |                        |          |           |                 |                            |             |                |
|         |                 |                    |                        | ✓        |           |                 |                            |             | ✓              |
|         |                 | ✓                  |                        |          |           |                 |                            |             |                |
| ✓       |                 |                    |                        |          | ✓         | ✓               |                            | ✓           |                |
|         |                 |                    |                        |          |           |                 |                            |             |                |
|         |                 |                    |                        | ✓        |           |                 | ✓                          | ✓           |                |
|         |                 |                    |                        |          |           |                 |                            |             | ✓              |
| ✓       |                 |                    |                        | ✓        |           |                 |                            |             |                |
| ✓       |                 |                    |                        |          | ✓         |                 |                            | ✓           |                |
| ✓       |                 |                    |                        |          | ✓         |                 |                            |             |                |
| ✓       |                 |                    |                        |          |           |                 |                            | ✓           |                |
| ✓       |                 |                    |                        |          | ✓         |                 |                            |             |                |
|         | ✓               |                    | ✓                      |          |           |                 |                            | ✓           |                |
|         |                 |                    |                        |          | ✓         |                 |                            |             |                |
|         |                 |                    | ✓                      | ✓        | ✓         |                 |                            |             |                |
|         |                 |                    |                        |          |           |                 |                            | ✓           |                |

lived experience as simulated patients resulted in sustained improvements in student confidence in discussing suicidal behaviour with those at risk [62]. These findings mirror outcomes seen in other healthcare education domains, where co-production with service users enhances empathy, communication, and learner engagement [95,96]. However, the literature also highlights the need for further research into the ethical, emotional, and pedagogical dimensions of this practice, to ensure that the inclusion of lived experience is both meaningful and safe for all involved [97].

The international scope of the literature included in this review reflects the global recognition of suicide prevention as a crucial competency for all health and social care professionals. Moreover, the inclusion of interdisciplinary teaching in 17% ( $n=10$ ) of the programmes signifies a growing awareness that suicide prevention is relevant across healthcare and social care disciplines. By identifying programmes that incorporate several healthcare disciplines, this review demonstrates the recognised importance of collaborative, cross-disciplinary teaching approaches. Research shows that interprofessional education enhances collaboration, mutual respect, and holistic understanding of complex issues like suicide prevention [98,99]. Consequentially, the integration of interprofessional education into training programmes can enhance the competencies of future practitioners, enabling them to better understand the multifaceted nature of suicide risk factors and the diverse needs of at-risk populations [40]. Interprofessional learning experiences encourage students to engage in shared problem-solving and develop mutual respect for each profession's contributions, leading to more effective care strategies [100,101]. However, interprofessional education remains an underutilised strategy in suicide prevention education and curricula [4,40]. As the landscape of healthcare continues to evolve, ongoing research into best practices for interprofessional education in suicide prevention will be critical. Future curriculum development should build on interprofessional frameworks to prepare students for real-world, team-based clinical contexts.

Several challenges in the development and implementation of suicide prevention training were highlighted across the literature. One significant barrier was the stigma associated with discussing suicide in educational settings [72].

**Table 3. Evaluation of suicide prevention training programmes.**

| Author (year)                 | Study design             | Follow-up periods                                                                        | Measures                                                                                                                                              | Type of control group | Outcomes                                                                                                                                                                                                                                                                                                                                                                                                                                                     |
|-------------------------------|--------------------------|------------------------------------------------------------------------------------------|-------------------------------------------------------------------------------------------------------------------------------------------------------|-----------------------|--------------------------------------------------------------------------------------------------------------------------------------------------------------------------------------------------------------------------------------------------------------------------------------------------------------------------------------------------------------------------------------------------------------------------------------------------------------|
| Almeida et al., 2017 [14]     | Pre-post evaluation      | Immediately before and after the module                                                  | Knowledge, confidence, and preparedness                                                                                                               | N/A                   | Statistically significant increases in knowledge, confidence, and preparedness from pre-test to post-test. Knowledge, confidence, and preparedness were significantly positively correlated, indicating that confidence and preparedness did not increase without a corresponding increase in knowledge.                                                                                                                                                     |
| Afsharnejad et al., 2022 [61] | Randomised control trial | Data was collected at three time points: baseline, 10-weeks, and 24-weeks from baseline. | Suicide Intervention Response Inventory (SIRI)                                                                                                        | Delayed start group   | Intention-to-treat analysis (N = 129) at 10-weeks demonstrated a significant improvement in generalised self-efficacy for "Talk-to-Me" compared to the control group with only the "Talk-to-Me" participants reporting increased knowledge in responding to suicidal ideation (primary outcome). This change was sustained for 24 weeks.                                                                                                                     |
| Bornheimer et al., 2024 [39]  | Pre-post evaluation      | Immediately before and after the module                                                  | Acceptability, feasibility, and preparedness                                                                                                          | N/A                   | Simulations were reported to be acceptable and feasible, with strong student desire and need for greater suicide prevention training. Significant improvements were reported in clinical skills via simulated training scores and perceptions of clinical preparedness.                                                                                                                                                                                      |
| Carpenter et al., 2023 [37]   | Pre-post evaluation      | Immediately before and after the module                                                  | Knowledge and self-efficacy                                                                                                                           | N/A                   | Both the mean knowledge score and mean self-efficacy score significantly increased from pre-test to post-test.                                                                                                                                                                                                                                                                                                                                               |
| Cates et al., 2017 [5]        | Pre-post evaluation      | Immediately before and after the clinical placement                                      | Attitudes to Suicide Prevention Scale                                                                                                                 | N/A                   | Statistically significant positive changes in total scale scores from pre-rotation to post-rotation were seen in attitudes toward suicide prevention.                                                                                                                                                                                                                                                                                                        |
| Choup et al., 2021 [44]       | Pre-post evaluation      | Immediately before and after the module                                                  | Self-report, pre-post survey was developed utilizing Ajzen's Theory of Planned Behaviour measurement framework                                        | N/A                   | Participants showed significant improvements in attitudes, confidence, and intentions towards using suicide prevention strategies, with medium-to-large effect sizes overall. The greatest improvements were in familiarity with suicide risk assessment, access to lethal means, and safety planning. The smallest improvements were in competency for identifying suicidal patients and understanding the role of medical providers in suicide prevention. |
| Cramer et al., 2019 [40]      | Pre-post evaluation      | Immediately before and after the module                                                  | 1. Suicide competency assessment form<br>Suicide Behaviours and Attitudes Questionnaire Scale<br>2. Suicide Prevention Knowledge Quiz<br>3. IPECC-Set | N/A                   | Primary outcomes included: (1) significant moderate-to-large gains in suicide prevention knowledge, clinical care skills, and ability to help self-harming patients; (2) moderate improvements in sensitivity to suicide risk factors; (3) non-significant impacts on IPE-related outcomes.                                                                                                                                                                  |
| Cramer and Long, 2018 [27]    | Pre-post evaluation      | Immediately before and after the module                                                  | 1. A ten-question multiple-choice knowledge quiz<br>2. Suicide competency assessment form                                                             | N/A                   | Significant positive gains in suicide prevention knowledge, and self-perceived suicide prevention competency total score.                                                                                                                                                                                                                                                                                                                                    |

(Continued)

**Table 3.** (Continued)

| Author (year)              | Study design             | Follow-up periods                             | Measures                                                                                                                                                                                    | Type of control group                                                                                                                     | Outcomes                                                                                                                                                                                                                                                                                                                                                                                                                                                            |
|----------------------------|--------------------------|-----------------------------------------------|---------------------------------------------------------------------------------------------------------------------------------------------------------------------------------------------|-------------------------------------------------------------------------------------------------------------------------------------------|---------------------------------------------------------------------------------------------------------------------------------------------------------------------------------------------------------------------------------------------------------------------------------------------------------------------------------------------------------------------------------------------------------------------------------------------------------------------|
| Cramer et al., 2016 [52]   | Pre-post evaluation      | Immediately before and after the module       | 1. Suicide Intervention Response Inventory-2 (SIRI-2)<br>2. Attitudes Toward Suicide Prevention Scale<br>3. Suicide competency assessment form<br>4. Suicide risk assessment knowledge quiz | N/A                                                                                                                                       | Significant increase in knowledge of suicide risk assessment and management, as well as improved student accuracy in estimating chronic and acute suicide risk in response to a mock case vignette.                                                                                                                                                                                                                                                                 |
| De Silva et al., 2015 [17] | Pre-post evaluation      | Immediately before and after the module       | Knowledge, skills, and attitudes                                                                                                                                                            | N/A                                                                                                                                       | Findings reported an increase in knowledge, skills and attitudes related to the assessment and management of individuals at risk for suicide, and the application of this ability to students' personal and professional lives.                                                                                                                                                                                                                                     |
| Desai et al, 2018 [53]     | Pre-post evaluation      | Immediately before and after the intervention | Knowledge, skills, and attitudes                                                                                                                                                            | N/A                                                                                                                                       | The intervention was found effective in increasing knowledge, changing attitude, and enhancing communication skills of medical students toward suicide prevention.                                                                                                                                                                                                                                                                                                  |
| Goh et al., 2016 [29]      | Pre-post evaluation      | Immediately before and after the intervention | Confidence and satisfaction                                                                                                                                                                 | N/A                                                                                                                                       | The use of standardised patient sessions significantly increased students' satisfaction and confidence. Qualitative feedback from students indicated a positive view of standardised patients as an effective tool for enhancing practical skills alongside didactic learning.                                                                                                                                                                                      |
| Harshe et al., 2022 [30]   | Pre-post evaluation      | Immediately before and after the workshop     | Suicide Opinion Questionnaire (SOQ)                                                                                                                                                         | N/A                                                                                                                                       | There was a 9.5% increase in SOQ scores post-intervention indicating a change toward positive attitudes/beliefs about suicide.                                                                                                                                                                                                                                                                                                                                      |
| Hjelvik et al., 2022 [25]  | Pre-post evaluation      | Immediately before and after the workshop     | A self-report pre-/postsurvey using Ajzen's theory of planned behaviour framework                                                                                                           | N/A                                                                                                                                       | Pre-/post surveys showed the greatest improvements in suicide prevention knowledge (self-rated) and the confidence in and likelihood of asking peers about suicide.                                                                                                                                                                                                                                                                                                 |
| Hill et al., 2024 [63]     | Randomised control trial | Immediately before and after the training     | 1. Literacy of Suicide Scale (LOSS)<br>2. Gatekeeper Behaviour Scale<br>3. Attitudes Toward Suicide Prevention Scale (ATSPS)                                                                | Control group received a suicide prevention module that purposefully omitted key elements of gatekeeper training (i.e., the AS+K? skills) | Compared to those in the control group, participants in the intervention group reported significantly greater gatekeeper preparedness and self-efficacy, and lower stigmatising attitudes towards suicide post on completion of the training. There were no significant differences in the likelihood of utilizing gatekeeper skills or suicide-related knowledge between the groups.                                                                               |
| Jacobson et al., 2012 [41] | Randomised control trial | Immediately after training and 6 months later | 1. Knowledge towards suicide prevention<br>2. Attitudes to Suicide prevention (ASP) Scale<br>3. Perceived preparedness<br>4. Asking Clients about Suicide in Response to Warning Signs      | Delayed start group                                                                                                                       | Overall, most students who completed the QPR training were satisfied with it and reported they would recommend the training to a peer or colleague. Interaction effects between group assignment and time suggest improvement among the intervention group regarding knowledge, efficacy to perform the gatekeeper role, and skills. Both groups improved over time for reluctance to engage with clients at risk for suicide, referral, and gatekeeper behaviours. |

(Continued)

**Table 3.** (Continued)

| Author (year)                        | Study design             | Follow-up periods                         | Measures                                                                                        | Type of control group                                                       | Outcomes                                                                                                                                                                                                                                                                                                                                                                                                            |
|--------------------------------------|--------------------------|-------------------------------------------|-------------------------------------------------------------------------------------------------|-----------------------------------------------------------------------------|---------------------------------------------------------------------------------------------------------------------------------------------------------------------------------------------------------------------------------------------------------------------------------------------------------------------------------------------------------------------------------------------------------------------|
| Kerr et al., 2018 [32]               | Pre-post evaluation      | Immediately before and after the training | General Perceived Self-efficacy (GPSE) Scale                                                    | N/A                                                                         | The results of the study show that the SafeTALK training had a positive impact on increasing the general self-efficacy of the participants in the whole sample. Both Males and females reported increased self-efficacy post SafeTALK training. This reported increase was more marked in the males in the sample compared to the females.                                                                          |
| Kratz et al., 2022 [23]              | Pre-post evaluation      | Immediately before and after the training | 1. Knowledge survey<br>2. Counselling Self-Estimate Inventory                                   | N/A                                                                         | Results indicate statistically significant improvements in students' knowledge and CSEI scores overtime. Moreover, CSEI and the subscale of dealing with difficult client behaviours showed statistically significant improvements from pre-simulation to post-simulation.                                                                                                                                          |
| Kullberg et al, 2020 [64]            | Randomised control trial | 1- and 3-months post intervention         | Knowledge, confidence, and guideline adherence                                                  | Delayed start control                                                       | Intention-to-treat analysis showed that the students in the intervention condition reported higher levels of self-evaluated knowledge, provider's confidence, and guideline adherence than those in the waitlist control.                                                                                                                                                                                           |
| LeCloux, 2021 [22]                   | Pre-post evaluation      | Immediately before and after the training | Knowledge, preparedness, and confidence                                                         | N/A                                                                         | Scores for suicide-related knowledge, perceived preparedness, and confidence increased significantly from pre- to post-test. Most students (95.7%) were satisfied or highly satisfied with the overall content, comprehensiveness, and format of the module. However, most (70.2%) reported a preference for face-to-face or hybrid delivery methods for suicide-related material rather than a fully online model. |
| Muehlenkamp and Quinn-Lee, 2023 [42] | Pre-post evaluation      | Pre- post- and 3-month follow-up          | Knowledge, skills, intention to intervene and self-efficacy through the "Program impact survey" | N/A                                                                         | Participants showed substantial increases in all outcomes from pre- to post-training, and these gains were maintained at follow-up                                                                                                                                                                                                                                                                                  |
| Muehlenkamp and Thoen, 2019 [26]     | Quasi-experimental       | Pre- post- and 4-month follow-up          | 1. Stigma of Suicide (SOSS) Scale<br>2. Suicide Prevention Advocacy                             | Students in the courses Cognitive Basis of Religion or Illness and Identity | Students in the suicidology course showed significant pre- to post- increases in knowledge and suicide prevention advocacy, alongside reductions in suicide stigma and negative attitudes compared to students in the control course, who showed no significant pre-/post changes. All effects were maintained over time.                                                                                           |
| Nebhinani et al., 2020 [56]          | Pre-post evaluation      | Immediately before and after the workshop | Attitudes to suicide prevention                                                                 | N/A                                                                         | Ten out of 14 attitudinal statements were significantly more favourable after completing a brief training on suicide prevention and management of suicide attempters.                                                                                                                                                                                                                                               |
| Osteen, 2018 [45]                    | Randomised control trial | Pre- post- and 4-month follow-up          | Knowledge, attitudes, self-efficacy, and gatekeeper behaviours.                                 | Matched control group                                                       | Results suggest improvements in post training measures for knowledge, attitudes, self-efficacy, reluctance, and the use of gatekeeper behaviours, but there was no supporting evidence for the presence of mediated effects on behaviour. Only self-efficacy demonstrated a strong direct relationship with gatekeeper behaviours.                                                                                  |

(Continued)

**Table 3.** (Continued)

| Author (year)                | Study design        | Follow-up periods                             | Measures                                                                   | Type of control group                           | Outcomes                                                                                                                                                                                                                                                                                                                                                                                                                                                                                                                |
|------------------------------|---------------------|-----------------------------------------------|----------------------------------------------------------------------------|-------------------------------------------------|-------------------------------------------------------------------------------------------------------------------------------------------------------------------------------------------------------------------------------------------------------------------------------------------------------------------------------------------------------------------------------------------------------------------------------------------------------------------------------------------------------------------------|
| Patel et al., 2018 [57]      | Pre-post evaluation | Immediately before and after the workshop     | Knowledge, attitudes, and skills                                           | N/A                                             | This study compared the knowledge, attitudes, and skills of both students and teachers after completing a suicide prevention gatekeeper training. Undergraduate students developed more positive attitude for suicidal behaviour where faculties developed more confident in their skill after training sessions.                                                                                                                                                                                                       |
| Pothireddy et al., 2022 [49] | Pre-post evaluation | Immediately before and after the training     | Knowledge and confidence                                                   | N/A                                             | Students' confidence and knowledge in recognizing and managing suicide warning signs improved significantly. More students directly asked about suicide and expedited referrals. Most (86%) reported planning to incorporate what they learned into practice                                                                                                                                                                                                                                                            |
| Pullen et al., 2016 [36]     | Pre-post evaluation | Immediately before and after the training     | Knowledge of suicide prevention                                            | N/A                                             | Overall, students responded very positively to suicide prevention gatekeeper training. Participants showed significant improvements in knowledge of suicide prevention pre- to post-training.                                                                                                                                                                                                                                                                                                                           |
| Stallman, 2020 [59]          | Pre-post evaluation | Immediately before and after the training     | Knowledge, attitudes, confidence, and self-care                            | N/A                                             | Participants showed significant improvements in knowledge, attitudes, confidence, and self-care pre- to post-training with moderate to very large effect sizes. There was no significant difference in outcomes between those who had and had not had previous training or experience working with people with suicidality.                                                                                                                                                                                             |
| Wathelet et al., 2023 [38]   | Quasi-experimental  | Immediately before and after the intervention | Suicide Attitudes and Behaviours (SABQ) Questionnaire                      | Matched control group assigned to other modules | Compared to the unexposed group, the exposed group reported greater satisfaction with the training, improved self-confidence in professional capacities, and a higher likelihood of having identified or helped someone with a mental health issue or consulted about a mental health concern.                                                                                                                                                                                                                          |
| Wilson et al., 2020 [72]     | Pre-post evaluation | Immediately before and after the training     | Attitudes, knowledge, and confidence                                       | N/A                                             | Students' comfort level with asking about suicidal ideation and their confidence with intervening significantly increased from the pre- to post-intervention survey.                                                                                                                                                                                                                                                                                                                                                    |
| Witry et al., 2020 [73]      | Pre-post evaluation | Immediately before and after the module       | Knowledge, confidence, and intention to intervene                          | N/A                                             | Students showed significant improvements in confidence and knowledge related to suicide prevention. Three-quarters (73%) reported being very or extremely likely to intervene when seeing warning signs, with confidence strongly linked to this likelihood. Most (93%) felt the training provided the right amount of background information, though 43% wanted more practice. Additionally, 35% found the material moderately emotionally difficult, and 5 students found it very or extremely emotionally difficult. |
| Yousuf et al., 2013 [9]      | Pre-post evaluation | Immediately before and after the module       | CASQ-HK Scale (attitudes and confidence in identifying a suicidal patient) | N/A                                             | Participation in the module led to statistically significant changes in attitudes towards suicide, including reduced negative appraisal, decreased stigmatization, and increased sensitivity to suicide-related facts.                                                                                                                                                                                                                                                                                                  |

<https://doi.org/10.1371/journal.pone.0328776.t003>

However, educational engagement with the topic was found to contribute to a reduction in stigmatising attitudes [56,102,103], echoing broader mental health education literature that supports the role of structured learning in shifting beliefs and promoting attitudinal change [104,105]. Furthermore, the inclusion of suicide prevention training was also observed to be associated with an increase in help-seeking behaviour from the students themselves. This is an encouraging finding, as there is a widely recognised risk of suicide in certain occupational groups including healthcare professionals [106,107]. This underscores the need for a structured self-care component in curricula, led by those with expertise in the area which presents a practical challenge. Learning outcomes for the topic of self-care were observed in only two of the included studies, showing a significant gap in addressing this need. Embedding this within suicide prevention training would align with wider calls in health education for curricula that support both clinical competency and practitioner wellbeing [108].

A key issue identified in the evaluation data of the included literature was a lack of long-term follow-up. While improvements in knowledge, confidence, and self-efficacy are highlighted, there is little discussion of whether these gains are sustained over time or translated into practical application in clinical settings. This gap points to the need for future research assessing the long-term impact of suicide prevention training on clinical practice and patient outcomes.

Another more practical challenge observed in the literature was identifying sufficient time in the student curriculum to facilitate training, an issue [11,17,52], which also arises in relation to other course offerings for health and social care disciplines [109]. This needs to be addressed at local level to ensure feasibility and appropriateness of suicide preventing training to respective curricula.

Although the review includes studies from multiple countries, it is heavily dominated by those from the USA and Australia. This may limit the relevance of the findings for countries with different healthcare systems, educational structures, or cultural attitudes towards suicide. As a result, the conclusions may not fully reflect the needs or experiences of institutions in lower-income regions or those with different public health priorities. This under-representation may reflect a combination of structural factors, including limited academic output, lack of formal suicide prevention education in LMICs, and resource constraints that hinder curriculum development or evaluation. For instance, Doty et al. (2022) conducted a systematic review and found that most suicide prevention studies in LMICs were concentrated in a few countries, with a notable scarcity of large-scale investigations tailored specifically for youth [110]. Additionally, the World Health Organization (WHO) has emphasised that many LMICs lack national suicide surveillance systems and systematic reporting, which hampers the development and evaluation of suicide prevention strategies [111]. As a result, the findings of this review may disproportionately reflect practices in high-income contexts. Future efforts should prioritise investment in suicide prevention training in LMICs, support capacity-building for local research, and encourage the development of culturally and contextually appropriate curricula. International collaboration and funding mechanisms could also play a role in bridging this evidence gap and ensuring more inclusive and globally relevant suicide prevention education.

## Strengths and limitations

The review's broad inclusion criteria, covering multiple healthcare disciplines, geographical regions, and both undergraduate and postgraduate programmes, ensures a comprehensive overview of suicide prevention training. This wide scope allows for a more inclusive summary of current practices, making the findings applicable to a variety of healthcare disciplines. Moreover, by encompassing both small-scale and large-scale programmes, the review captures a diverse range of teaching approaches, student populations, and institutional practices, providing a more complete picture of the current suicide prevention training landscape.

Another significant strength of this scoping review was the methodological rigor applied to the search strategy, which we continuously sought to update. Additionally, we made a concerted effort to explore as many grey literature sources as possible within our time constraints, and we also conducted both forward and backward citation searching. A further strength lies in the decision to include only peer-reviewed publications, ensuring that all sources met recognised



academic standards and had undergone formal scholarly review. This approach enhances the credibility and methodological rigour of the findings presented. However, this decision also presents a limitation. By excluding non-peer-reviewed grey literature – such as policy documents, national frameworks, and institutional curriculum drafts – we may have missed valuable insights into the practical development and implementation of suicide prevention curricula, particularly in low- and middle-income countries where academic publication may be less frequent. Future reviews may benefit from incorporating high-quality grey literature to capture a more comprehensive picture of global educational practices in this area.

A further notable limitation is the variability in the level of detail reported across the included studies. Many articles did not specify key elements, such as the proportion of the programme devoted to suicide prevention, the involvement of regulatory or accreditation bodies, or detailed descriptions of the teaching methodologies used. This inconsistency in reporting makes it difficult to draw clear conclusions about the structure and content of these programmes and hampers the ability to compare studies effectively.

Additionally, the review does not provide a thorough assessment of the quality of the studies included. As scoping reviews aim to map the existing literature rather than critically appraise study quality, this approach can lead to the inclusion of studies with varying levels of methodological rigour. Equally important to consider, is the focus of this review on module design and quantitative outcomes, excluding insights gained from qualitative findings. We acknowledge that there is much to learn from student experiences and perceptions of suicide prevention training [9,31,43]. Future work should look to focus on culmination of qualitative research to better understand students' experiences, preferences and feedback on such training.

## Conclusion

In synthesis, by embedding a standardised set of competencies across all disciplines in an interprofessional setting, students can develop the necessary foundational skills for identifying and responding to those at risk. Despite the development of learning outcomes to reflect core competencies in suicide prevention within the reviewed literature, considerable variability has been noted. The absence of standardised training and competency frameworks across institutions and countries reflects ongoing challenges in ensuring that all professionals prepared to address suicide risk. A unified framework would not only ensure that all professionals are equally equipped in suicide prevention skills, but also promote interprofessional collaboration, enabling a more cohesive and coordinated approach to suicide prevention education. This review is an important first step in cohering the available evidence to inform the development of standardised competencies for suicide prevention training for health and social care students.

## Supporting information

### **S1 Table. PRISMA ScR Checklist.**

(DOCX)

### **S2 Table. Search strategy and results.**

(DOCX)

### **S3 File. Indexes in Web of Science Core Collection.**

(DOCX)

### **S4 Table. Data extraction template.**

(DOCX)

### **S5 Table. Learning outcomes of suicide prevention training for health and social care students.**

(DOCX)

## Author contributions

**Conceptualization:** Clíodhna O' Brien, Kerrie Gallagher, Michelle O' Driscoll, Doireann Ní Dhálaigh, Paul Corcoran, Eve Griffin.

**Data curation:** Clíodhna O' Brien, Kerrie Gallagher, Michelle O' Driscoll, Mette Valdersdorf Jensen.

**Formal analysis:** Clíodhna O' Brien, Kerrie Gallagher, Michelle O' Driscoll, Doireann Ní Dhálaigh, Mette Valdersdorf Jensen.

**Funding acquisition:** Paul Corcoran, Eve Griffin.

**Methodology:** Clíodhna O' Brien, Kerrie Gallagher, Michelle O' Driscoll, Doireann Ní Dhálaigh, Eve Griffin.

**Project administration:** Clíodhna O' Brien, Kerrie Gallagher, Michelle O' Driscoll, Eve Griffin.

**Resources:** Paul Corcoran, Eve Griffin.

**Supervision:** Paul Corcoran.

**Validation:** Kerrie Gallagher, Michelle O' Driscoll, Mette Valdersdorf Jensen.

**Writing – original draft:** Clíodhna O' Brien, Kerrie Gallagher, Doireann Ní Dhálaigh, Paul Corcoran.

**Writing – review & editing:** Clíodhna O' Brien, Kerrie Gallagher, Michelle O' Driscoll, Mette Valdersdorf Jensen, Eve Griffin.

## References

1. Pirkis J, Dandona R, Silverman M, Khan M, Hawton K. Preventing suicide: a public health approach to a global problem. *Lancet Public Health*. 2024;9(10):e787–95.
2. Ahmedani BK, Westphal J, Autio K, Elsis F, Peterson EL, Beck A, et al. Variation in patterns of health care before suicide: A population case-control study. *Prev Med*. 2019;127:105796. <https://doi.org/10.1016/j.ypmed.2019.105796> PMID: 31400374
3. Leahy D, Larkin C, Leahy D, McAuliffe C, Corcoran P, Williamson E, et al. The mental and physical health profile of people who died by suicide: findings from the Suicide Support and Information System. *Soc Psychiatry Psychiatr Epidemiol*. 2020;55(11):1525–33. <https://doi.org/10.1007/s00127-020-01911-y> PMID: 32656640
4. Delaney T, Nelson L, Lopez D. Suicide prevention education for health care providers: challenges and opportunities. *Suicide Risk Assess Prev*. 2022;:1–21.
5. Cates ME, Hodges JRC, Woolley TW. Pharmacists' attitudes, interest, and perceived skills regarding suicide prevention. *Ment Health Clin*. 2019;9(1):30–5. <https://doi.org/10.9740/mhc.2019.01.030> PMID: 30627501
6. Erbutto D, Berardelli I, Sarubbi S, Rogante E, Sparagna A, Nigrelli G. Suicide-related knowledge and attitudes among a sample of mental health professionals. *Int J Environ Res Public Health*. 2021;18(16):8296. <https://doi.org/10.3390/ijerph18168296>
7. Silva C, Smith AR, Dodd DR, Covington DW, Joiner TE. Suicide-Related Knowledge and Confidence Among Behavioral Health Care Staff in Seven States. *Psychiatr Serv*. 2016;67(11):1240–5. <https://doi.org/10.1176/appi.ps.201500271> PMID: 27301763
8. Kawanishi C, Sato R, Yamada T, Ikeda H, Suda A, Hirayasu Y. Knowledge and attitudes of nurses, nursing students and psychiatric social workers concerning current suicide-related issues in Japan. *Prim Care Ment Health*. 2006;4(4):285.
9. Yousuf S, Beh PSL, Wong PWC. Attitudes towards suicide following an undergraduate suicide prevention module: experience of medical students in Hong Kong. *Hong Kong Med J*. 2013;19(5):377–85. <https://doi.org/10.12809/hkmj133950> PMID: 24088587
10. Office of the Surgeon General (US, National Action Alliance for Suicide Prevention (US. 2012 national strategy for suicide prevention: goals and objectives for action: a report of the US Surgeon General and of the National Action Alliance for Suicide Prevention. 2012.
11. Phillips EC, Neagle G, Cameron B, Money Penny M. It's okay to talk: suicide awareness simulation. *Clin Teach*. 2019;16(4):373–7. <https://doi.org/10.1111/tct.13044> PMID: 31210003
12. Schmitz WM Jr, Allen MH, Feldman BN, Gutin NJ, Jahn DR, Kleespies PM, et al. Preventing suicide through improved training in suicide risk assessment and care: an American Association of Suicidology Task Force report addressing serious gaps in U.S. mental health training. *Suicide Life Threat Behav*. 2012;42(3):292–304. <https://doi.org/10.1111/j.1943-278X.2012.00090.x> PMID: 22494118
13. Ruth BJ, Gianino M, Muroff J, McLaughlin D, Feldman BN. You Can't Recover From Suicide: Perspectives on Suicide Education in MSW Programs. *Journal of Social Work Education*. 2012;48(3):501–16. <https://doi.org/10.5175/jsw.2012.201000095>
14. Almeida J, O'Brien KHM, Norton K. Social Work's Ethical Responsibility to Train MSW Students to Work with Suicidal Clients. *Soc Work*. 2017;62(2):181–3. <https://doi.org/10.1093/sw/swx011> PMID: 28180907

15. Rudd MD, Cukrowicz KC, Bryan CJ. Core competencies in suicide risk assessment and management: implications for supervision. *Train Educ Prof Psychol*. 2008;2(4):219–28.
16. Dexter-Mazza ET, Freeman KA. Graduate training and the treatment of suicidal clients: the students' perspective. *Suicide Life Threat Behav*. 2003;33(2).
17. De Silva E, Bowerman L, Zimitat C. A suicide awareness and intervention program for health professional students. *Educ Health (Abingdon)*. 2015;28(3):201–4. <https://doi.org/10.4103/1357-6283.178597> PMID: [26996645](#)
18. McGowan J, Straus S, Moher D, Langlois EV, O'Brien KK, Horsley T, et al. Reporting scoping reviews-PRISMA ScR extension. *J Clin Epidemiol*. 2020;123:177–9. <https://doi.org/10.1016/j.jclinepi.2020.03.016> PMID: [32229248](#)
19. Gallagher K, O'Brien C, O'Driscoll M, Ní Dhálaigh D, Corcoran P, Griffin E. Suicide prevention curriculum development for health and social care students: Protocol for a scoping review. *PLoS One*. 2023;18(12):e0285231. <https://doi.org/10.1371/journal.pone.0285231> PMID: [38060488](#)
20. Arksey H, O'Malley L. Scoping studies: towards a methodological framework. *Int J Soc Res Methodol*. 2005;8(1):19–32. <https://doi.org/10.1080/1364557032000119616>
21. Ouzzani M, Hammady H, Fedorowicz Z, Elmagarmid A. Rayyan-a web and mobile app for systematic reviews. *Syst Rev*. 2016;5(1):210. <https://doi.org/10.1186/s13643-016-0384-4> PMID: [27919275](#)
22. LeCloux M. Efficient, yet Effective: Improvements in Suicide-related Knowledge, Confidence, and Preparedness after the Deployment of a Brief Online Module on Suicide in a Required MSW Course. *J Teach Soc Work*. 2021;41(4):389–407. <https://doi.org/10.1080/08841233.2021.1954577>
23. Kratz J, Bragg JE, Nay EDE, Miller-Cribbs J, Munoz RT, Howell D. Educational assessment of a social simulation for MSW students using the CAMS framework. *Soc Work Educ*. 2022;41(2):248–60.
24. Kourgiantakis T, Sewell KM, Lee E, Kirvan A. MSW students' perspectives on learning in a social work practice in mental health course: a qualitative research study. *Soc Work Ment Health*. 2021;19(2):141–65. <https://doi.org/10.1080/15332985.2021.1894628>
25. Hjelvik A, Eldridge A, Furnari M, Hoeflich H, Chen JI, Roth B, et al. A Peer-to-Peer Suicide Prevention Workshop for Medical Students. *MedEd-PORTAL*. 2022;18:11241. [https://doi.org/10.15766/mep\\_2374-8265.11241](https://doi.org/10.15766/mep_2374-8265.11241) PMID: [35518385](#)
26. Muehlenkamp JJ, Thoen SK. Short- and Long-Term Impact of an Undergraduate Suicidology Course. *Suicide Life Threat Behav*. 2019;49(6):1573–86. <https://doi.org/10.1111/sltb.12552> PMID: [30977549](#)
27. Cramer RJ, Long MM. Competency-based Suicide Prevention Education: Implementation of a Pilot Course for Undergraduate Health Professions Students. *Acad Psychiatry*. 2018;42(6):857–61. <https://doi.org/10.1007/s40596-018-0890-x> PMID: [29492833](#)
28. El-Den S, Chen TF, Moles RJ, O'Reilly C. Assessing Mental Health First Aid Skills Using Simulated Patients. *Am J Pharm Educ*. 2018;82(2):6222. <https://doi.org/10.5688/ajpe6222> PMID: [29606711](#)
29. Goh YS, Selvarajan S, Chng ML, Tan CS, Yobas P. Using standardized patients in enhancing undergraduate students' learning experience in mental health nursing. *Nurse Educ Today*. 2016;45:167–72.
30. Harshe D, Harshe S, Behere P, Halder A, Ravindran NP, Avula N, et al. Efficacy of a suicide sensitisation and prevention (SSP) workshop for medical students on their attitudes, beliefs, and factual knowledge on suicide: A pilot study. *Indian J Psychiatry*. 2022;64(6):588–94. [https://doi.org/10.4103/indianjpsychiatry.indianjpsychiatry\\_262\\_22](https://doi.org/10.4103/indianjpsychiatry.indianjpsychiatry_262_22) PMID: [36714666](#)
31. Heyman I, Webster BJ, Tee S. Curriculum development through understanding the student nurse experience of suicide intervention education—A phenomenographic study. *Nurse Educ Pract*. 2015;15(6):498–506. <https://doi.org/10.1016/j.nepr.2015.04.008> PMID: [26025505](#)
32. Kerr S, Martin C, Fleming M. Preventing suicide; nurse education and the occluded issue of gender. *Nurse Educ Pract*. 2018;32:58–63. <https://doi.org/10.1016/j.nepr.2018.07.004> PMID: [30031273](#)
33. Mospan CM, Hess R, Blackwelder R, Grover S, Dula C. A two-year review of suicide ideation assessments among medical, nursing, and pharmacy students. *J Interprof Care*. 2017;31(4):537–9.
34. Ng L, Datt A, Moir F, Hakiha H, O'Callaghan A, Lampshire D, et al. Medical students' evaluation of a suicide prevention multimedia resource: A focus group study. *Int J Soc Psychiatry*. 2022;68(6):1238–47. <https://doi.org/10.1177/00207640221113751> PMID: [35892140](#)
35. Price R, Weingartner LA, Brikker E, Shaw MA, Shreffler J, O'Connor SS. Improving medical student attitudes toward suicide prevention through a patient safety planning clerkship initiative. *Acad Psychiatry*. 2022;46(5):616–21.
36. Pullen JM, Gilje F, Tesar E. A descriptive study of baccalaureate nursing students' responses to suicide prevention education. *Nurse Educ Pract*. 2016;16(1):104–10. <https://doi.org/10.1016/j.nepr.2015.09.007> PMID: [26494302](#)
37. Carpenter DM, Stover AN, Harris SC, Anksorus H, Lavigne JE. Impact of a Brief Suicide Prevention Training with an Interactive Video Case Assessment on Student Pharmacist Outcomes. *Am J Pharm Educ*. 2023;87(7):100093. <https://doi.org/10.1016/j.ajpe.2023.100093> PMID: [37380269](#)
38. Wathelet M, Dezetree A, Guénard C, Duhem S, Chouraki V, Thomas P. The Mental Health and Suicide Prevention Training Module of the French Sanitary Service: Effectiveness on Health Students. *Psychol Sch*. 2023;60(4):1006–18.
39. Bornheimer LA, Verdugo JL, Humm L, Steacy C, Krasnick J, Goldstein Grumet J, et al. Computerized Suicide Prevention Clinical Training Simulations: A Pilot Study. *Res Soc Work Pract*. 2024;34(2):182–93. <https://doi.org/10.1177/10497315231161563> PMID: [38881845](#)
40. Cramer RJ, La Guardia AC, Wright-Berryman J, Long MM, Adams Tufts K. Integrating Interprofessional Education into Suicide Prevention Training: Results from A Pilot Evaluation. *Soc Work Public Health*. 2019;34(7):628–36. <https://doi.org/10.1080/19371918.2019.1635950> PMID: [31365321](#)

41. Jacobson JM, Osteen PJ, Sharpe TL, Pastoor JB. Randomized trial of suicide gatekeeper training for social work students. *Res Soc Work Pract*. 2012;22(3):270–81.
42. Muehlenkamp JJ, Quinn-Lee L. Effectiveness of a peer-led gatekeeper program: A longitudinal mixed-method analysis. *J Am Coll Health*. 2023;71(1):282–91. <https://doi.org/10.1080/07448481.2021.1891080> PMID: [33759720](#)
43. Sharpe TL, Jacobson Frey J, Osteen PJ, Bernes S. Perspectives and Appropriateness of Suicide Prevention Gatekeeper Training for MSW Students. *Soc Work Ment Health*. 2014;12(2):117–31.
44. Chuop M, Michel Z, Shah R, Chen JI, Black W. From Screening to Interventions: Teaching Clinical Suicide Prevention Skills to Medical Students. *Acad Psychiatry*. 2021;45(3):292–6. <https://doi.org/10.1007/s40596-020-01248-3> PMID: [32495309](#)
45. Osteen PJ. Suicide intervention gatekeeper training: modeling mediated effects on development and use of gatekeeper behaviors. *Res Soc Work Pract*. 2018;28(7):848–56.
46. Lerchenfeldt S, Kamel-ElSayed S, Patino G, Thomas DM, Wagner J. Suicide assessment and management team-based learning module. *MedEd-PORTAL*. 2020;16:10952.
47. Luebbert R, Popkess A. The influence of teaching method on performance of suicide assessment in baccalaureate nursing students. *J Am Psychiatr Nurses Assoc*. 2015;21(2):126–33. <https://doi.org/10.1177/1078390315580096> PMID: [25979880](#)
48. O'Reilly CL, Moles RJ, Boukouvalas E, El-Den S. Assessing students' mental health crisis skills via consumers with lived experience: a qualitative evaluation. *J Ment Health Train Educ Pract*. 2019;14(5):361–71.
49. Pothireddy N, Lavigne JE, Groman AS, Carpenter DM. Developing and evaluating a module to teach suicide prevention communication skills to student pharmacists. *Curr Pharm Teach Learn*. 2022;14(4):449–56. <https://doi.org/10.1016/j.cptl.2022.02.002> PMID: [35483810](#)
50. Retamero C, Walsh L, Otero-Perez G. Use of the film *The Bridge* to augment the suicide curriculum in undergraduate medical education. *Acad Psychiatry*. 2014;38(5):605–10. <https://doi.org/10.1007/s40596-014-0086-y> PMID: [24699837](#)
51. Perez A, Gaehle K, Sobczak B, Stein K. Virtual simulation as a learning tool for teaching graduate nursing students to manage difficult conversations. *Clin Simul Nurs*. 2022;62:66–72.
52. Cramer RJ, Bryson CN, Stroud CH, Ridge BE. A pilot test of a graduate course in suicide theory, risk assessment, and management. *Teach Psychol*. 2016;43(3):238–42.
53. Desai ND, Chavda P, Shah SH, Shah N, Shah SN, Sharma E. A novel approach to suicide prevention - Educating when it matters. *Ind Psychiatry J*. 2018;27(1):115–23. [https://doi.org/10.4103/ipj.ipj\\_10\\_18](https://doi.org/10.4103/ipj.ipj_10_18) PMID: [30416302](#)
54. Hutson E, Zeno R. Clinical Competence for Youth Suicide: Use of Simulation in Pediatric and Psychiatric-Mental Health Nurse Practitioner Programs. *J Psychosoc Nurs Ment Health Serv*. 2021;59(8):7–13. <https://doi.org/10.3928/02793695-20210617-01> PMID: [34343055](#)
55. Vincent PD, David P-M. Suicide prevention in pharmaceutical education: Raising awareness with inspiring stories. *Ment Health Clin*. 2016;6(2):109–13. <https://doi.org/10.9740/mhc.2016.03.109> PMID: [29955456](#)
56. Nebhinani N, Kuppi PP, Mamta 3, Paul K. Effectiveness of Brief Educational Training on Medical Students' Attitude toward Suicide Prevention. *J Neurosci Rural Pract*. 2020;11(4):609–15. <https://doi.org/10.1055/s-0040-1716769> PMID: [33144799](#)
57. Patel R, Mehta R, Dave K, Chaudhary P. Effectiveness of gatekeeper training among medical professional and undergraduate students: outcomes of the optimizing suicide prevention program. *Indian J Psychiatry*. 2018;60(5):90.
58. Ranahan P. Suicide prevention education within youth work higher education: negotiating presence and procedure. *Int J Child Youth Fam Stud*. 2020;11(3):167–91.
59. Stallman H. Online needs-based and strengths-focused suicide prevention training: evaluation of care center dot collaborate center dot connect. *Aust Psychol*. 2020;55(3):220–9.
60. Takahashi A, Tachikawa H, Takayashiki A, Maeno T, Shiratori Y, Matsuzaki A. Crisis-management, anti-stigma, and mental health literacy program for university students (CAMPUS): A preliminary evaluation of suicide prevention. *F1000Research*. 2022.
61. Afsharnejad B, Milbourn B, Hayden-Evans M, Baker-Young E, Black MH, Thompson C, et al. The efficacy of the "Talk-to-Me" suicide prevention and mental health education program for tertiary students: a crossover randomised control trial. *Eur Child Adolesc Psychiatry*. 2023;32(12):2477–89.
62. Boukouvalas EA, El-Den S, Chen TF, Moles R, Saini B, Bell A, et al. Confidence and attitudes of pharmacy students towards suicidal crises: patient simulation using people with a lived experience. *Soc Psychiatry Psychiatr Epidemiol*. 2018;53(11):1185–95. <https://doi.org/10.1007/s00127-018-1582-2> PMID: [30155558](#)
63. Hill RM, Picou P, Hussain Z, Vieyra BA, Perkins KM. Randomized Controlled Trial of an Online Suicide Prevention Gatekeeper Training Program: Impacts on College Student Knowledge, Gatekeeper Skills, and Suicide Stigma. *Crisis*. 2024;45(1):57–64.
64. Kullberg M-LJ, Mouthaan J, Schoorl M, de Beurs D, Kenter RMF, Kerkhof AJ. E-Learning to Improve Suicide Prevention Practice Skills Among Undergraduate Psychology Students: Randomized Controlled Trial. *JMIR Ment Health*. 2020;7(1):e14623. <https://doi.org/10.2196/14623> PMID: [32012076](#)
65. Lu C, Lee H, Hsu S, Shu I. Elements of Scenario-Based Learning on Suicidal Patient Care Using Real-Time Video. *Stud Health Technol Inform*. 2016;225:257–61. PMID: [27332202](#)

66. Magerman J, Demedts D, De Smet S, Fobelets M. Using simulation to help health professions students learn to talk to clients about suicide. *Creat Nurs*. 2022;28(4):266–73.
67. McKeirnan KC, MacCamy KL, Robinson JD, Ebinger M, Willson MN. Implementing Mental Health First Aid Training in a Doctor of Pharmacy Program. *Am J Pharm Educ*. 2023;87(8):100006. <https://doi.org/10.1016/j.ajpe.2023.01.001> PMID: [37597905](#)
68. Osteen PJ, Jacobson JM, Sharpe TL. Suicide Prevention in Social Work Education: How Prepared Are Social Work Students? *J Soc Work Educ*. 2014;50(2):349–64.
69. Quemada-González C, Flores Becerra-Martos E, Blenkarn M, Gutiérrez-Rodríguez L, García-Mayor S, León-Campos Á, et al. Nursing students' experience of approaching risk for suicide behaviour through simulated environments: A content analysis study. *Arch Psychiatr Nurs*. 2024;50:5–13. <https://doi.org/10.1016/j.apnu.2024.03.001> PMID: [38789234](#)
70. Scott M. Teaching note-understanding of suicide prevention, intervention, and postvention: curriculum for MSW students. *J Soc WORK Educ*. 2015;51(1):177–85.
71. Ward LJ. SMILE: Simple, Mental Health, Initiative in Learning and Education. *Educ Health (Abingdon)*. 2011;24(3):537. PMID: [22267348](#)
72. Willson MN, Robinson JD, McKeirnan KC, Akers JM, Buchman CR. Training Student Pharmacists in Suicide Awareness and Prevention. *Am J Pharm Educ*. 2020;84(8):ajpe847813. <https://doi.org/10.5688/ajpe847813> PMID: [32934394](#)
73. Witry M, Kauer J, Fravel M, Reist J, Viyyuri B. Evaluation of a Question Persuade Refer (QPR) training for student pharmacists. *Mental Health & Prevention*. 2020;18:200180. <https://doi.org/10.1016/j.mhp.2020.200180>
74. Witry MJ, Neblett K, Hutchens S, Catney C. When a patient talks about suicide: Adding a social worker led session on the pharmacist's role in suicide prevention to the PharmD curriculum. *Curr Pharm Teach Learn*. 2019;11(6):585–91. <https://doi.org/10.1016/j.cptl.2019.02.027> PMID: [31213314](#)
75. Vreuls J, Koeslag-Kreunen M, van der Klink M, Nieuwenhuis L, Boshuizen H. Responsive curriculum development for professional education: different teams, different tales. *Curric J*. 2022;33(4):636–59.
76. Brink S, Carlsson CJ, Enelund M, Georgsson F, Keller E, Lyng R, et al. Curriculum agility: Responsive organization, dynamic content, and flexible education. In *IEEE*; 2021. p. 1–5.
77. NHS, England. National collaborating centre for mental health self-harm and suicide prevention competence framework: community and public health. 2018;
78. World Health Organization. Preventing suicide: a global imperative [Internet]. Geneva: World Health Organization; 2014 [cited 2025 Jun 18]. p. 89. Available from: <https://iris.who.int/handle/10665/131056>
79. Mason R, Schwartz J. Using a Delphi method to develop competencies: The case of domestic violence. *Community Med Health Educ*. 2012;2(2).
80. Ausman C, Almatar D, Kiepek N. Medical training to effectively support patients who use substances across practice settings: a scoping review of recommended competencies. *Can Med Educ J*. 2024;15(3):73–96. <https://doi.org/10.36834/cmej.75973> PMID: [39114773](#)
81. Berman S, Brown T, Mizelle C, Diep T, Gerber MR, Jelley M, et al. Roadmap for Trauma-Informed Medical Education: Introducing an Essential Competency Set. *Acad Med*. 2023;98(8):882–8. <https://doi.org/10.1097/ACM.0000000000005196> PMID: [36862618](#)
82. Krathwohl DR. A Revision of Bloom's Taxonomy: An Overview. *Theory Into Practice*. 2002;41(4):212–8. [https://doi.org/10.1207/s15430421tip4104\\_2](https://doi.org/10.1207/s15430421tip4104_2)
83. Carless-Kane S, Nowell L. Nursing students learning transfer from classroom to clinical practice: An integrative review. *Nurse Educ Pract*. 2023;71:103731. <https://doi.org/10.1016/j.nepr.2023.103731> PMID: [37517230](#)
84. Coleman D, McLaughlin D. Using simulated patients as a learning strategy to support undergraduate nurses to develop patient-teaching skills. *Br J Nurs*. 2019;28(20):1300–6. <https://doi.org/10.12968/bjon.2019.28.20.1300> PMID: [31714829](#)
85. Beyer DA. Effectiveness of Human Patient Simulator as A Classroom Teaching Strategy. *Clin Simul Nurs*. 2012;8(7):e301–5. <https://doi.org/10.1016/j.ecns.2011.01.005>
86. Korayem GB, Alshaya OA, Kurdi SM, Alnajjar LI, Badr AF, Alfahed A. Simulation-based education implementation in pharmacy curriculum: A review of the current status. *Adv Med Educ Pract*. 2022;:649–60.
87. Lee J, Kim H, Kim KH, Jung D, Jowsey T, Webster CS. Effective virtual patient simulators for medical communication training: A systematic review. *Med Educ*. 2020;54(9):786–95. <https://doi.org/10.1111/medu.14152> PMID: [32162355](#)
88. Harris N, Bacon CEW. Developing cognitive skills through active learning: a systematic review of health care professions. *Athl Train Educ J*. 2019;14(2):135–48.
89. Chong SC, Anderson K, Mackenzie-Stewart R, Hobbs C, Conna B. Embedding experiential learning in undergraduate health promotion curriculum. *Health Promot J Austr*. 2022;33:9–16.
90. Fewster-Thuyente L, Batteson TJ. Kolb's Experiential Learning Theory as a Theoretical Underpinning for Interprofessional Education. *J Allied Health*. 2018;47(1):3–8. PMID: [29504014](#)
91. Hill B. Research into experiential learning in nurse education. *Br J Nurs*. 2017;26(16):932–8. <https://doi.org/10.12968/bjon.2017.26.16.932> PMID: [28880621](#)
92. Kolb DA. Experiential learning: experience as the source of learning and development. FT Press; 2014.



93. Pasco S, Wallack C, Sartin RM, Dayton R. The impact of experiential exercises on communication and relational skills in a suicide prevention gatekeeper-training program for college resident advisors. *J Am Coll Health*. 2012;60(2):134–40. <https://doi.org/10.1080/07448481.2011.623489> PMID: [22316410](#)
94. Reiff M, Kumar M, Bvunzawabaya B, Madabhushi S, Spiegel A, Bolnick B. I CARE: Development and evaluation of a campus gatekeeper training program for mental health promotion and suicide prevention. *J Coll Stud Psychother*. 2019;33(2):107–30.
95. O'Connor S, Zhang M, Trout KK, Snibsoer AK. Co-production in nursing and midwifery education: A systematic review of the literature. *Nurse Educ Today*. 2021;102:104900. <https://doi.org/10.1016/j.nedt.2021.104900> PMID: [33905899](#)
96. Horgan A, Manning F, Bocking J, Happell B, Lahti M, Doody R, et al. "To be treated as a human": Using co-production to explore experts by experience involvement in mental health nursing education - The COMMUNE project. *Int J Ment Health Nurs*. 2018;27(4):1282–91. <https://doi.org/10.1111/inm.12435> PMID: [29377483](#)
97. Kalocsai C, Agrawal S, de Bie L, Beder M, Bellissimo G, Berkhout S, et al. Power to the people? A co-produced critical review of service user involvement in mental health professions education. *Adv Health Sci Educ Theory Pract*. 2024;29(1):273–300. <https://doi.org/10.1007/s10459-023-10240-z> PMID: [37247126](#)
98. Patel H, Perry S, Badu E, Mwangi F, Onifade O, Mazurskyy A, et al. A scoping review of interprofessional education in healthcare: evaluating competency development, educational outcomes and challenges. *BMC Med Educ*. 2025;25(1):409. <https://doi.org/10.1186/s12909-025-06969-3> PMID: [40114152](#)
99. Spaulding EM, Marvel FA, Jacob E, Rahman A, Hansen BR, Hanyok LA, et al. Interprofessional education and collaboration among healthcare students and professionals: a systematic review and call for action. *J Interprof Care*. 2021;35(4):612–21. <https://doi.org/10.1080/13561820.2019.1697214> PMID: [31865823](#)
100. World Health Organization. Framework for action on interprofessional education and collaborative practice [Internet]. World Health Organization; 2010. Available from: [https://apps.who.int/iris/bitstream/handle/10665/70185/WHO\\_HRH\\_HPN\\_10.3\\_eng.pdf;jsessionid=3351451835E915FF721E06BD01FA054A?sequence=1](https://apps.who.int/iris/bitstream/handle/10665/70185/WHO_HRH_HPN_10.3_eng.pdf;jsessionid=3351451835E915FF721E06BD01FA054A?sequence=1)
101. Zenani NE, Sehularo LA, Gause G, Chukwuere PC. The contribution of interprofessional education in developing competent undergraduate nursing students: integrative literature review. *BMC Nurs*. 2023;22(1):315. <https://doi.org/10.1186/s12912-023-01482-8> PMID: [37710257](#)
102. Heim E, Henderson C, Kohrt BA, Koschorke M, Milenova M, Thornicroft G. Reducing mental health-related stigma among medical and nursing students in low- and middle-income countries: a systematic review. *Epidemiol Psychiatr Sci*. 2019;29:e28. <https://doi.org/10.1017/S2045796019000167> PMID: [30929650](#)
103. Papish A, Kassam A, Modgill G, Vaz G, Zanussi L, Patten S. Reducing the stigma of mental illness in undergraduate medical education: a randomized controlled trial. *BMC Med Educ*. 2013;13:141. <https://doi.org/10.1186/1472-6920-13-141> PMID: [24156397](#)
104. Waqas A, Malik S, Fida A, Abbas N, Mian N, Miryala S. Interventions to reduce stigma related to mental illnesses in educational institutes: A systematic review. *Psychiatr Q*. 2020;91(3):887–903.
105. Wong JCM, Chua JYX, Chan PY, Shorey S. Effectiveness of educational interventions in reducing the stigma of healthcare professionals and healthcare students towards mental illness: A systematic review and meta-analysis. *J Adv Nurs*. 2024;80(10):4074–88. <https://doi.org/10.1111/jan.16127> PMID: [38402635](#)
106. Dutheil F, Aubert C, Pereira B, Dambrun M, Moustafa F, Mermillod M, et al. Suicide among physicians and health-care workers: A systematic review and meta-analysis. *PLoS One*. 2019;14(12):e0226361. <https://doi.org/10.1371/journal.pone.0226361> PMID: [31830138](#)
107. Milner AJ, Maheen H, Bismark MM, Spittal MJ. Suicide by health professionals: a retrospective mortality study in Australia, 2001–2012. *Med J Aust*. 2016;205(6):260–5.
108. Posluns K, Gall TL. Dear Mental Health Practitioners, Take Care of Yourselves: a Literature Review on Self-Care. *Int J Adv Couns*. 2020;42(1):1–20. <https://doi.org/10.1007/s10447-019-09382-w> PMID: [32435076](#)
109. Chen AMH, Brown S, Mark K, McBane S. An overview of instructional approaches and decision-making strategies to curtail curricular overload. *Am J Pharm Educ*. 2023;87(8):100013.
110. Doty B, Bass J, Ryan T, Zhang A, Wilcox H. Systematic review of suicide prevention studies with data on youth and young adults living in low-income and middle-income countries. *BMJ Open*. 2022;12(9):e055000. <https://doi.org/10.1136/bmjopen-2021-055000> PMID: [36691131](#)
111. World Health Organization. National suicide prevention strategies: progress, examples and indicators [Internet]. Geneva: World Health Organization; 2018 [cited 2025 May 9]. Available from: <https://iris.who.int/handle/10665/279765>
